# Supplementary material
Source: PubMed Central journal article supplement (PMC2648089)
Supplement: tpc.108.064667_1.pdf [file tpc.108.064667_1.pdf]

Supplemental Data Okuda et al., (2009) Pentatricopeptide repeat proteins with the DYW motif have distinct molecular functions in RNA editing and RNA cleavage in Arabidopsis chloroplasts.

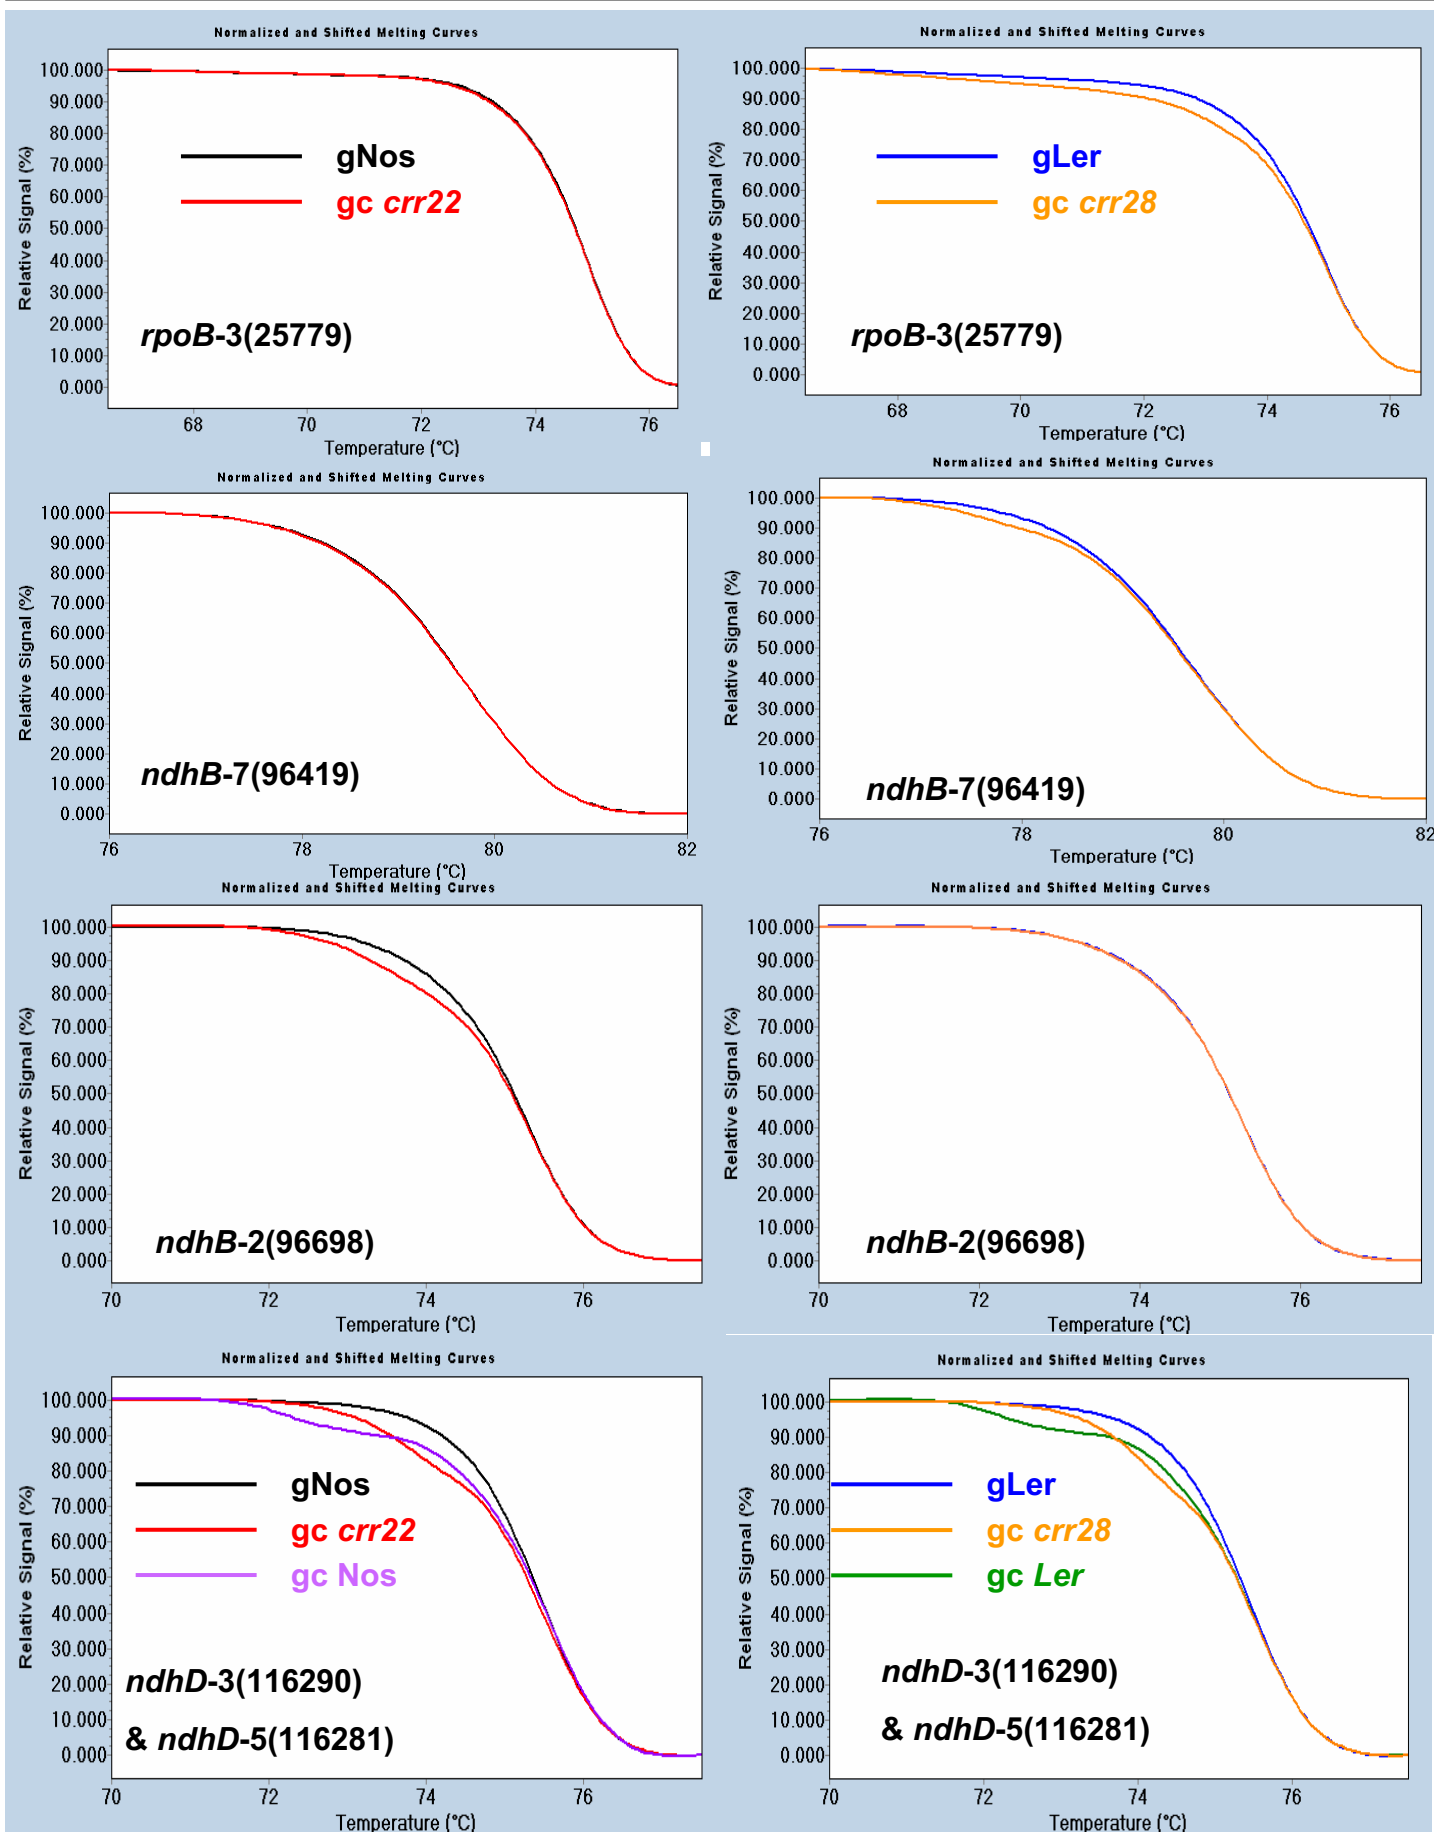

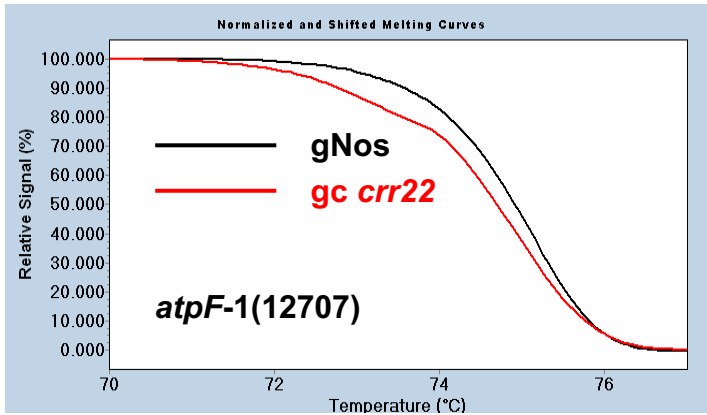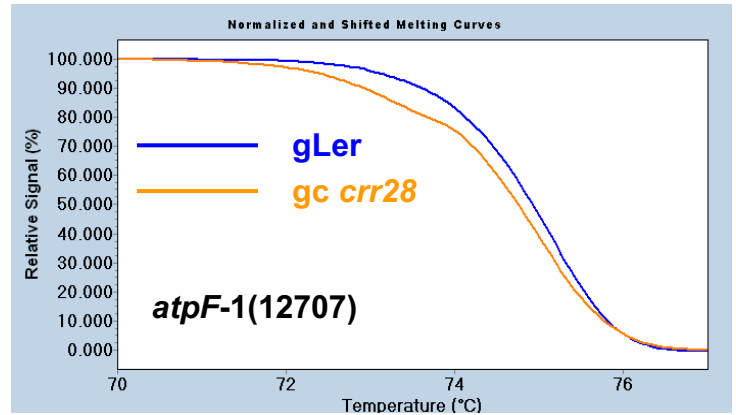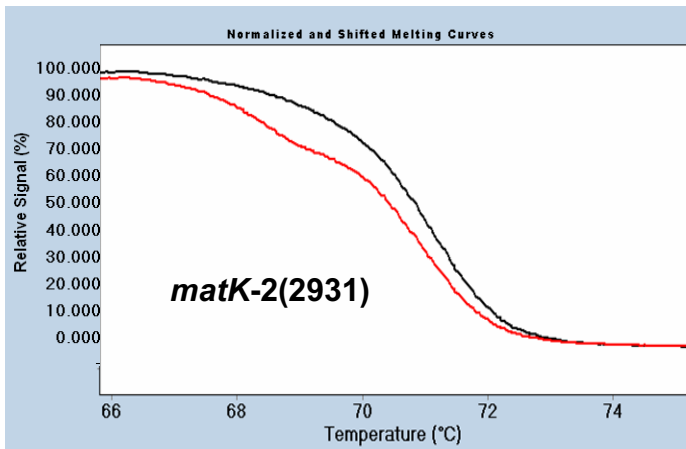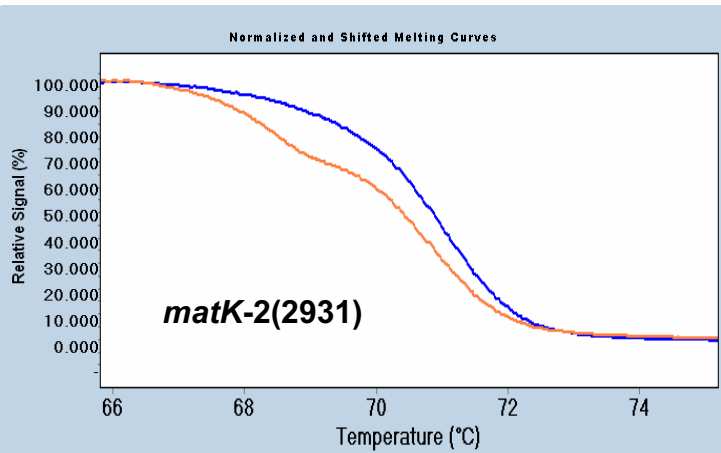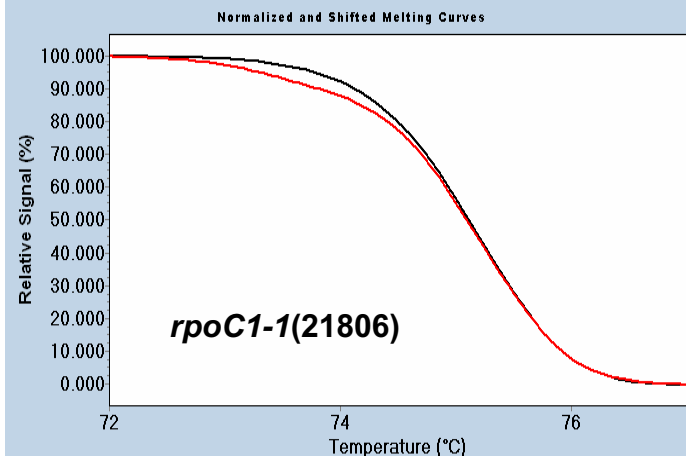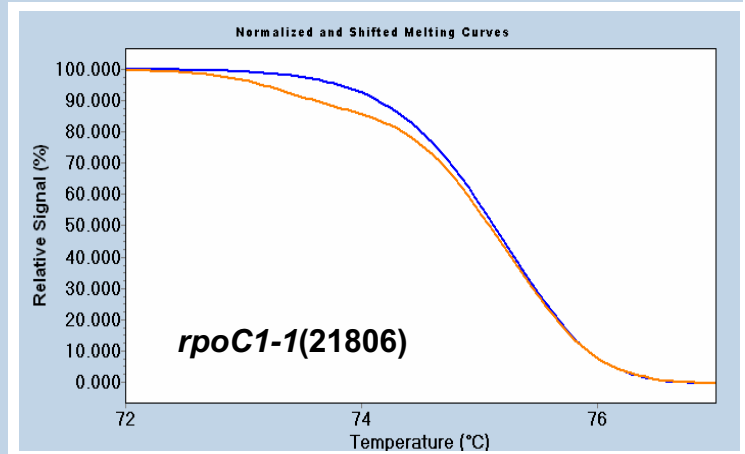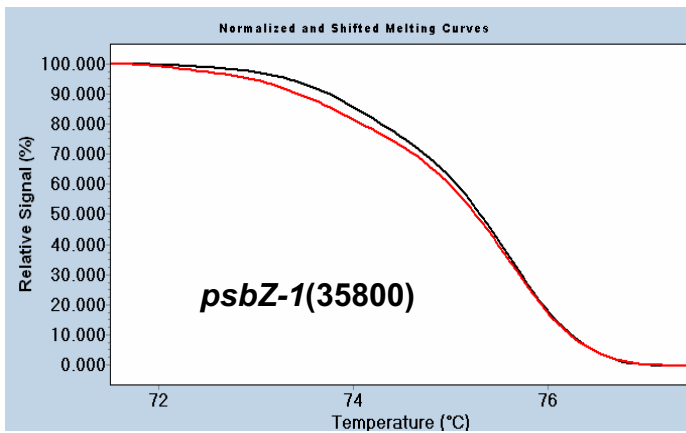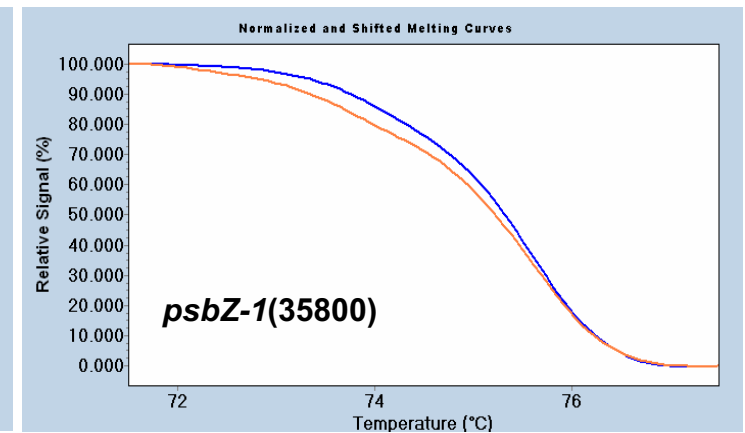

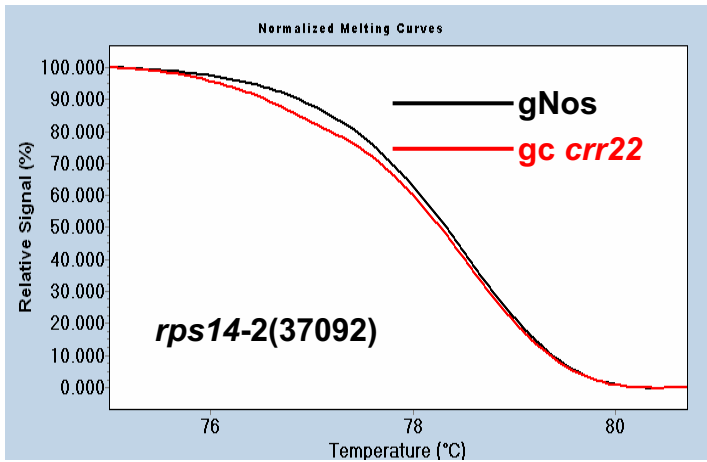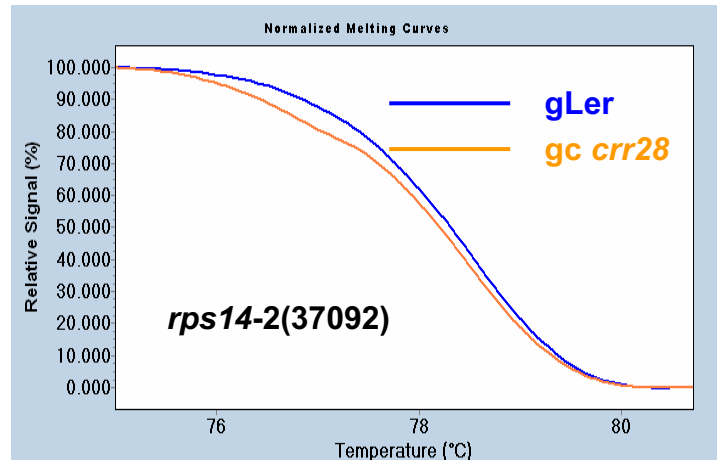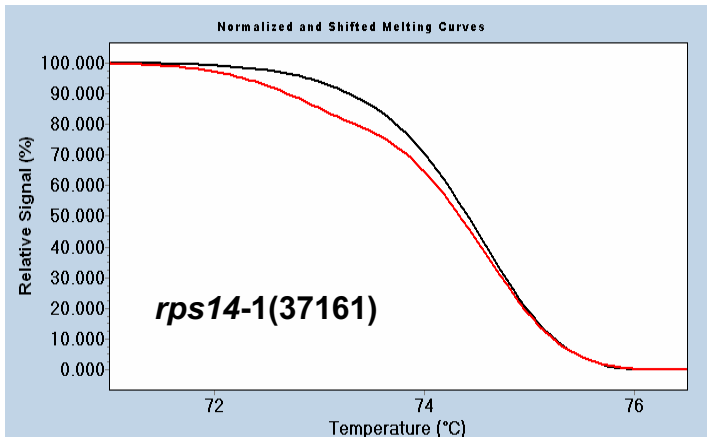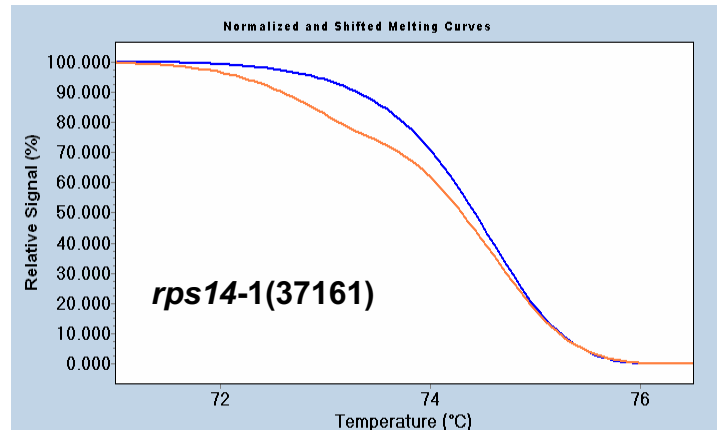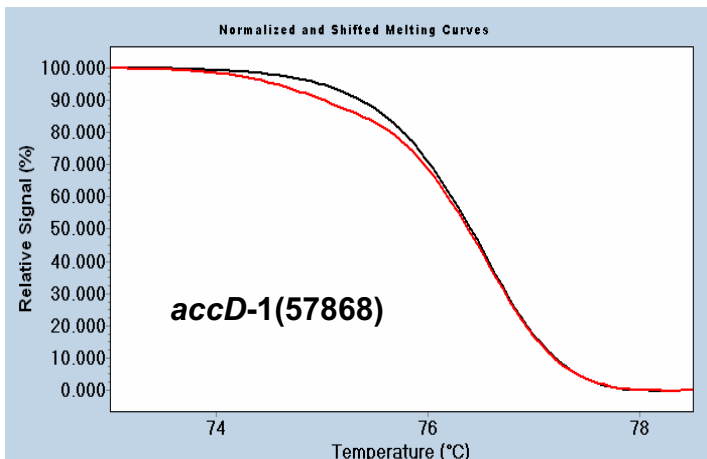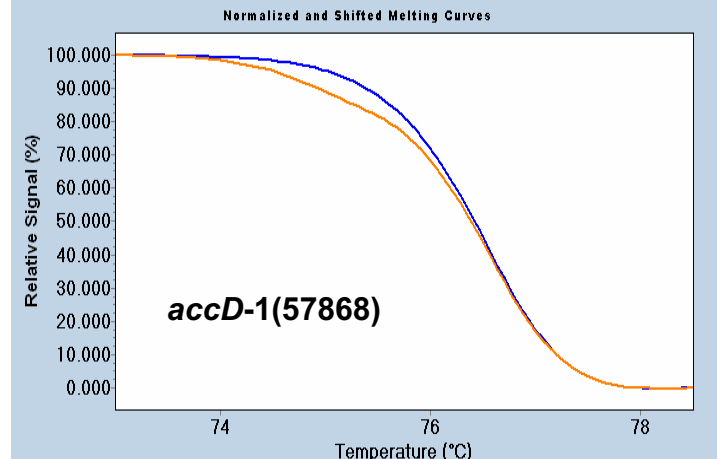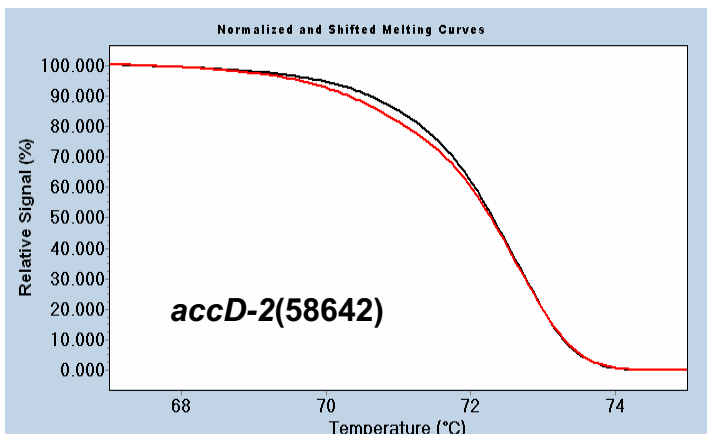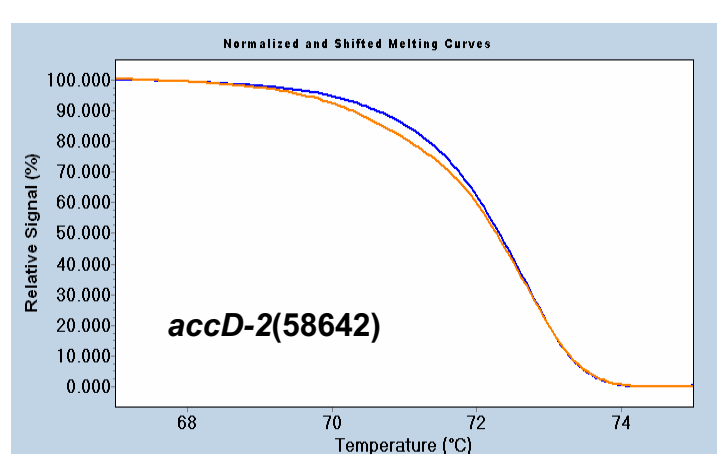

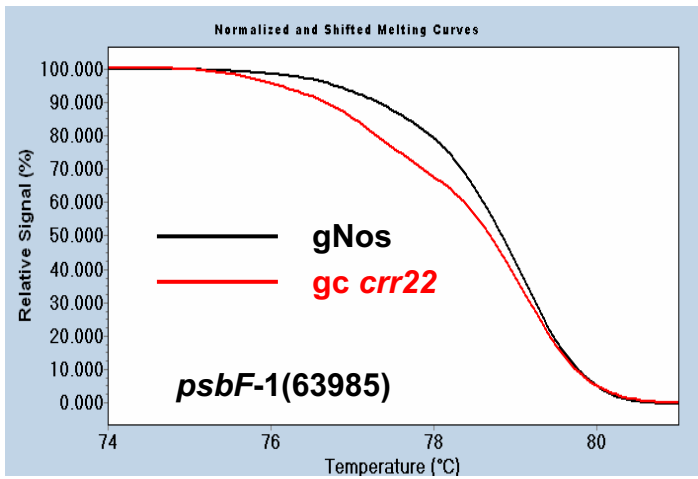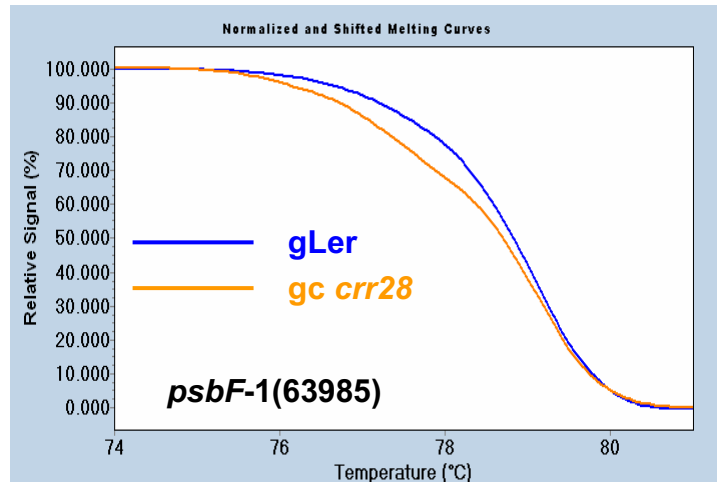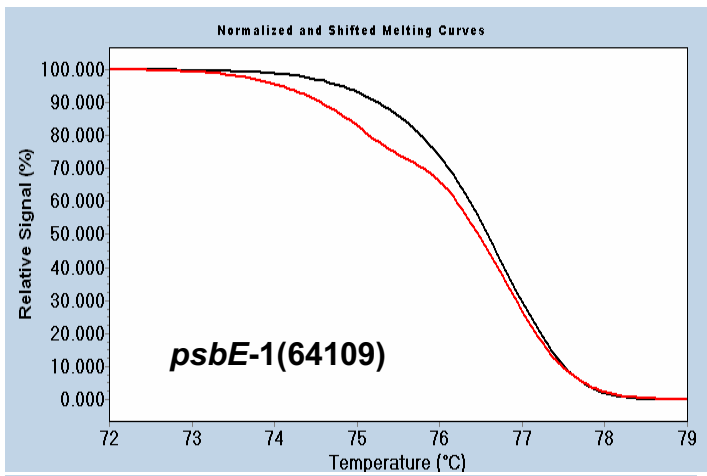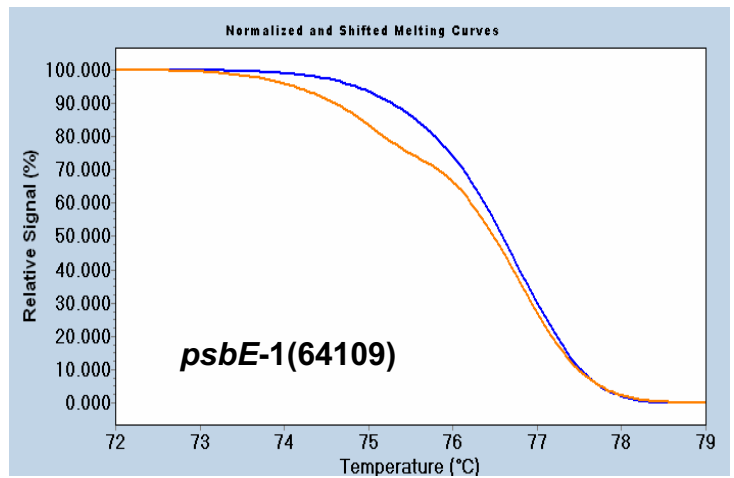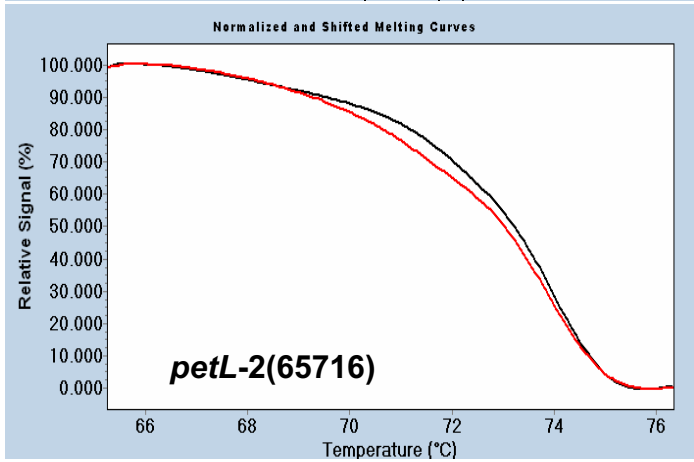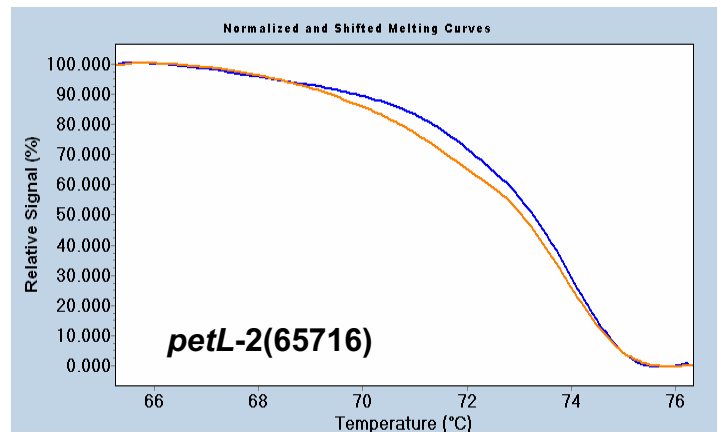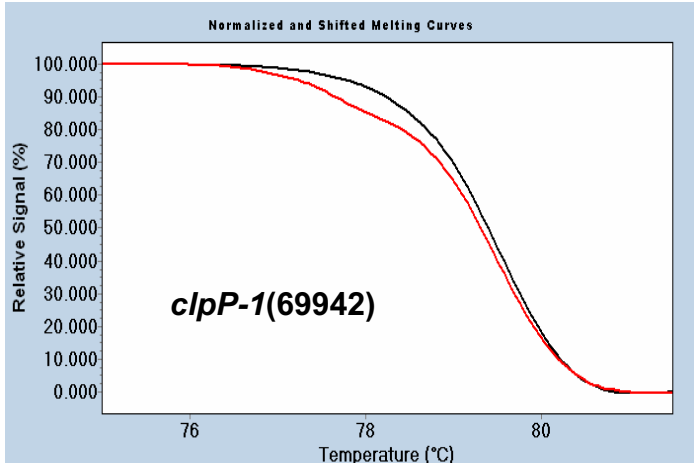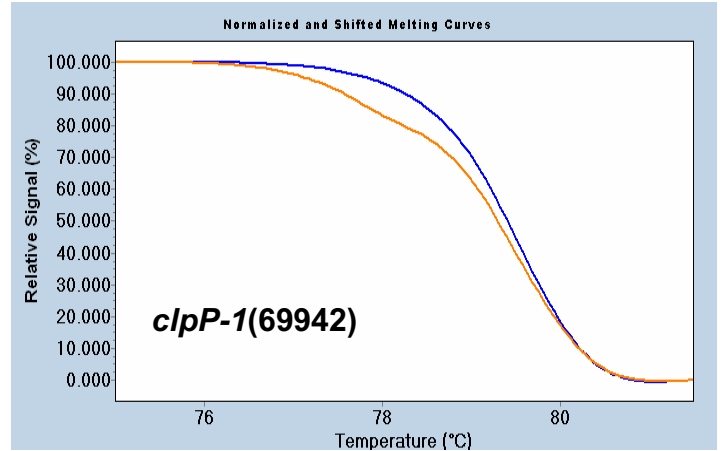

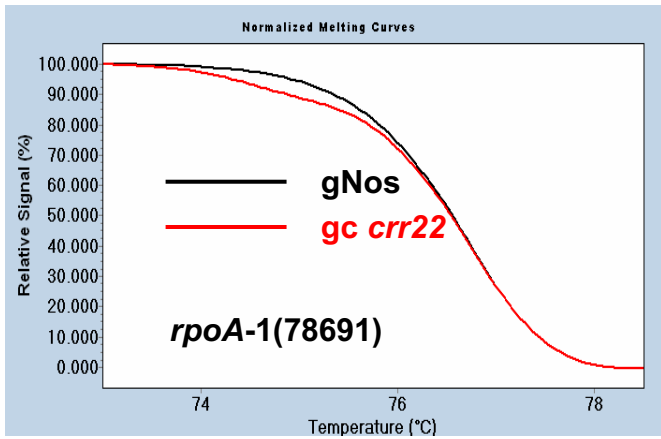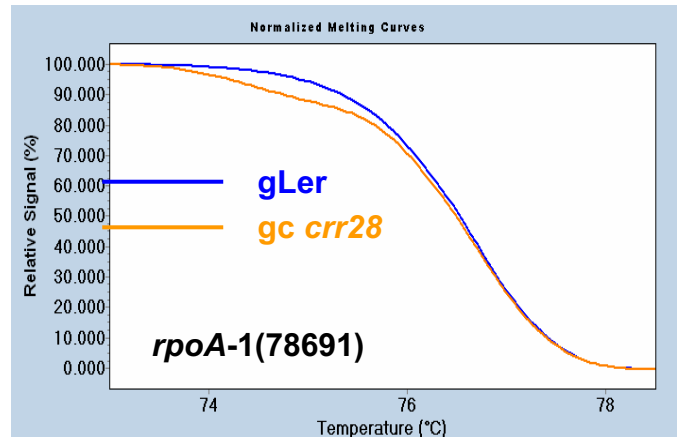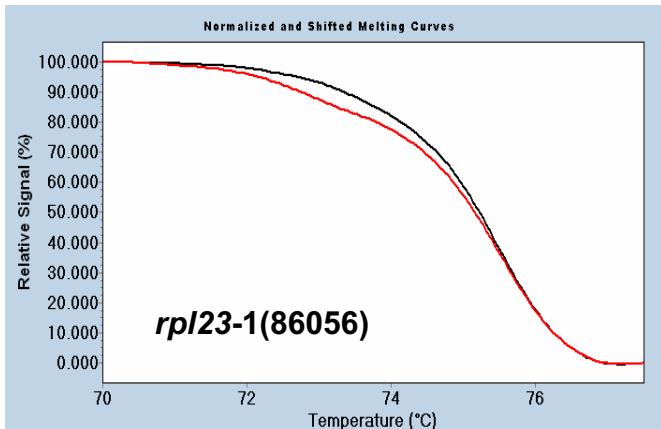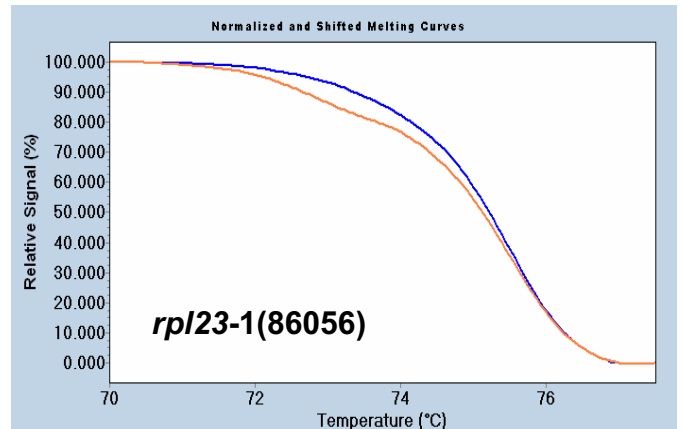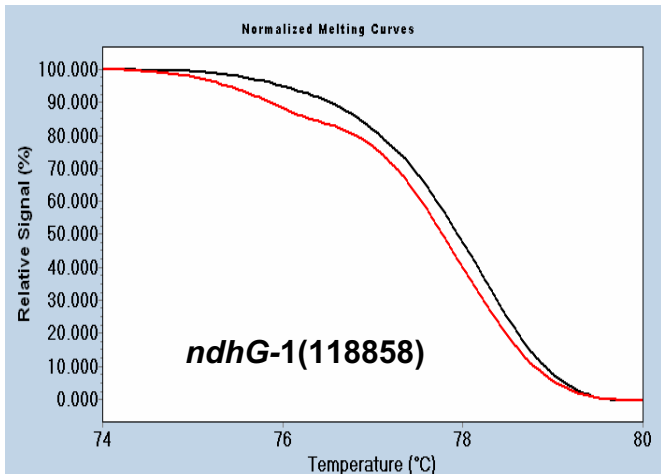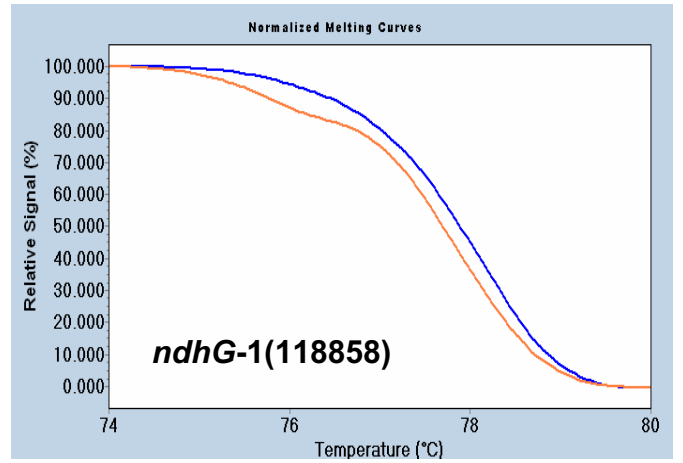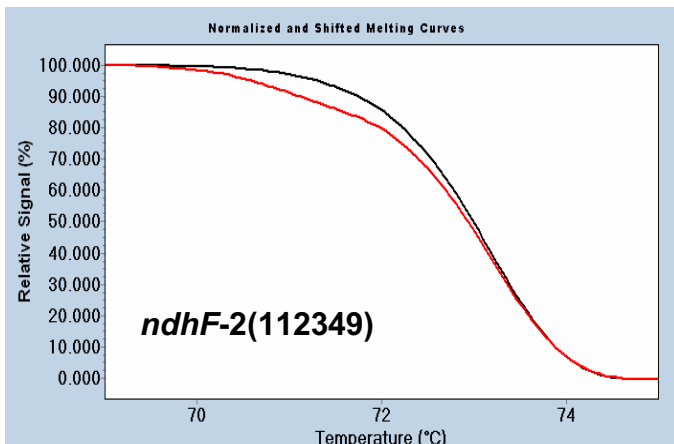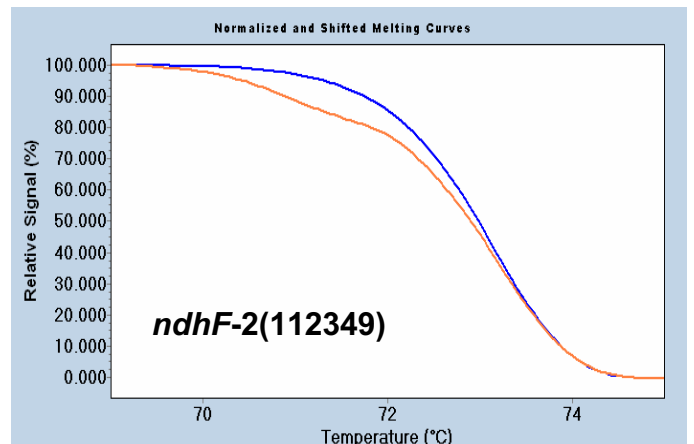

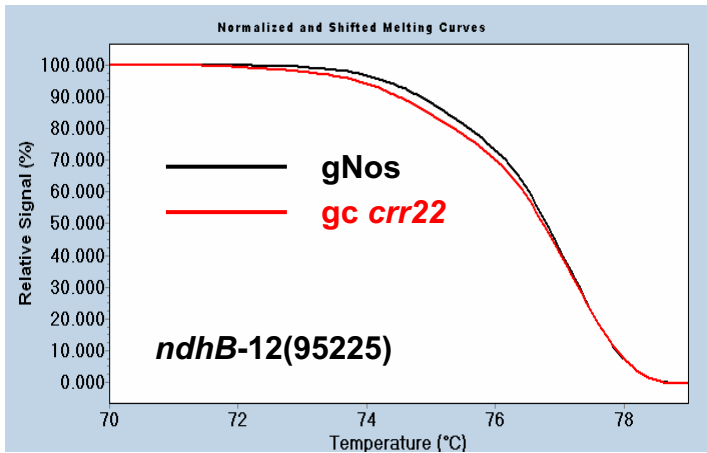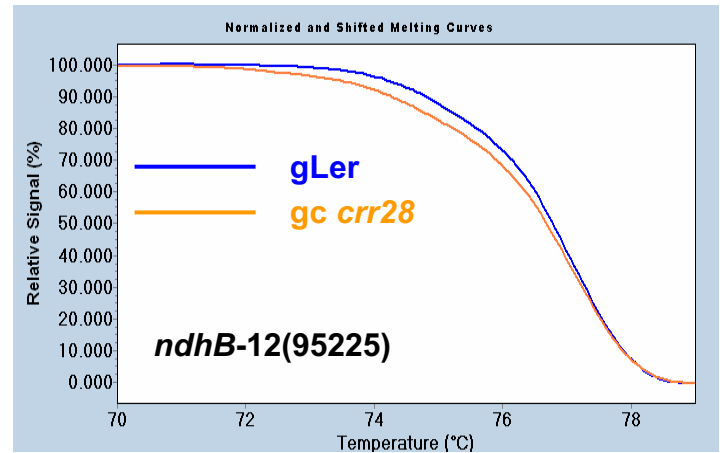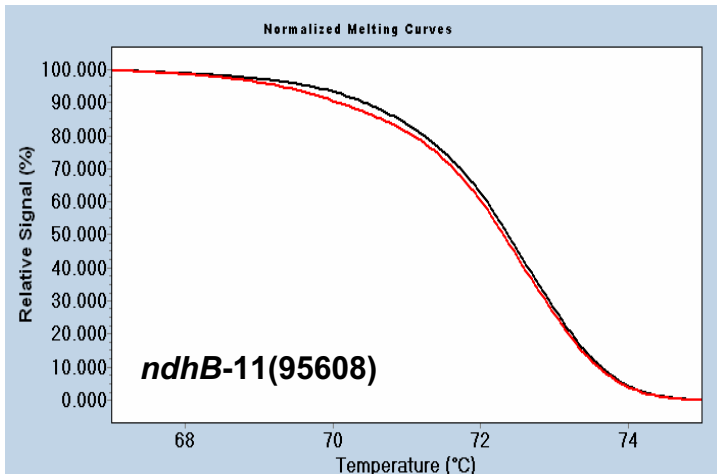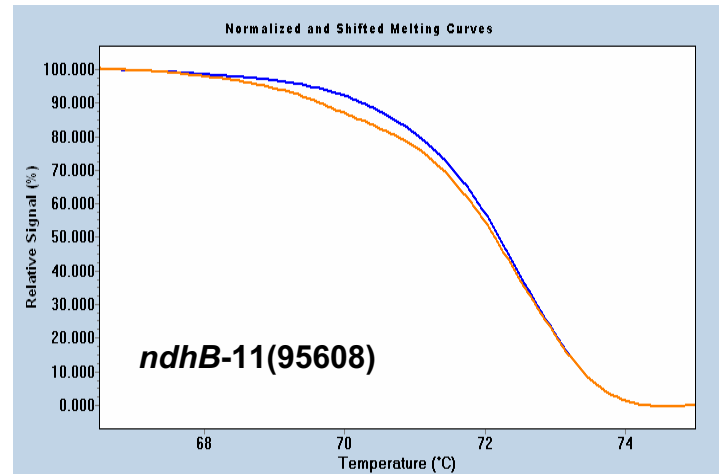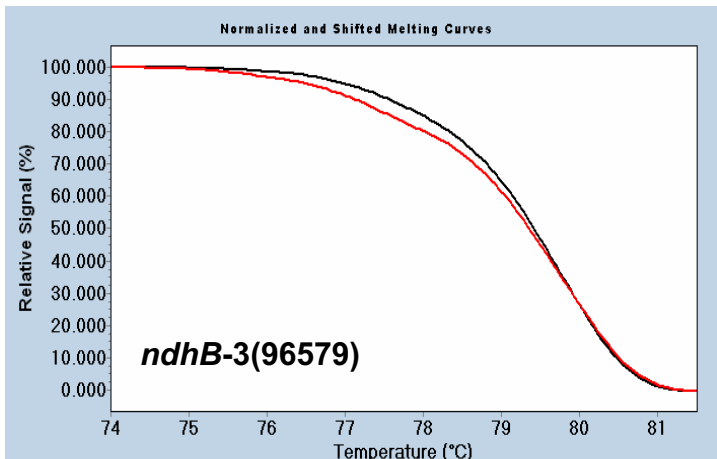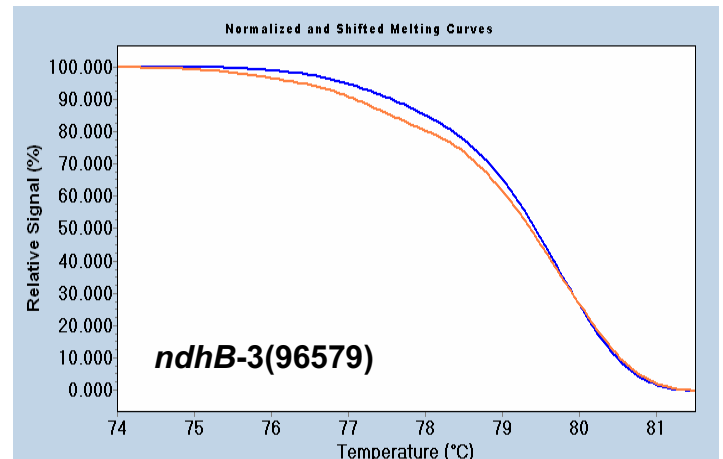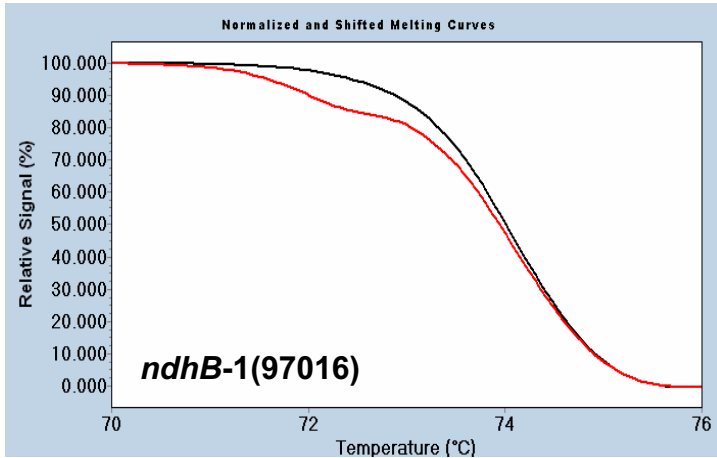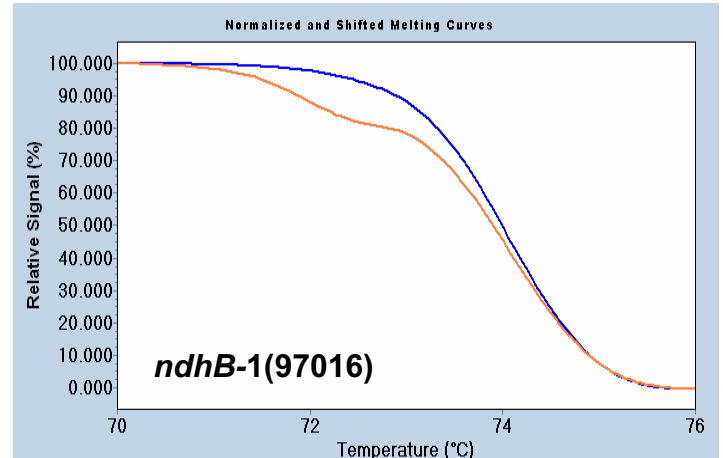

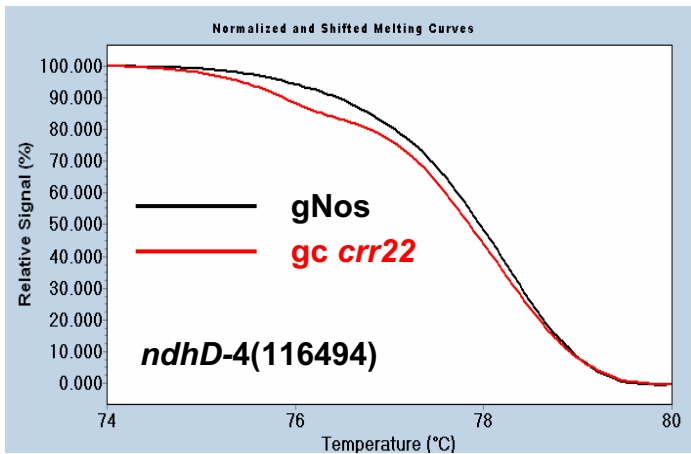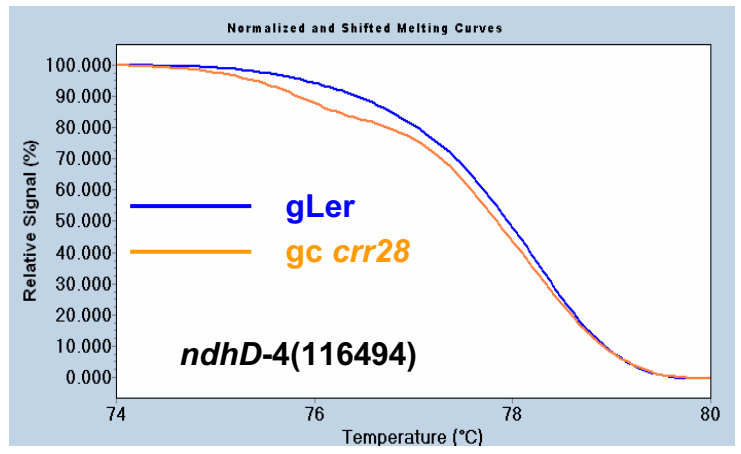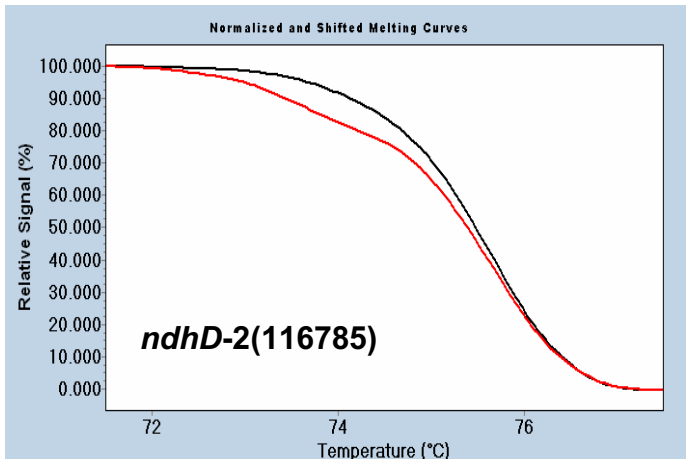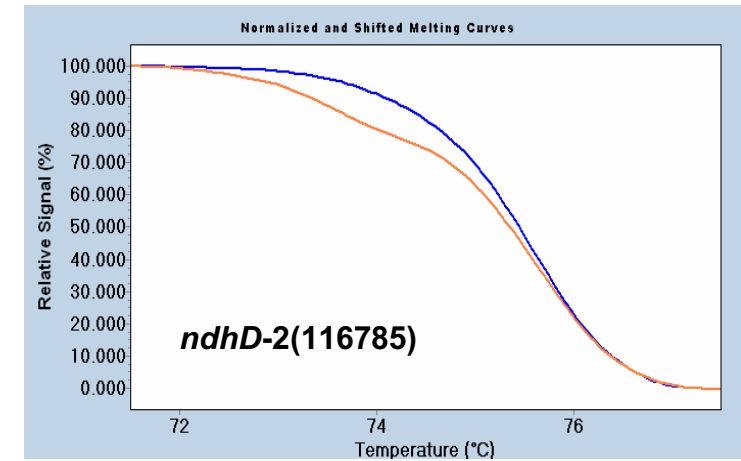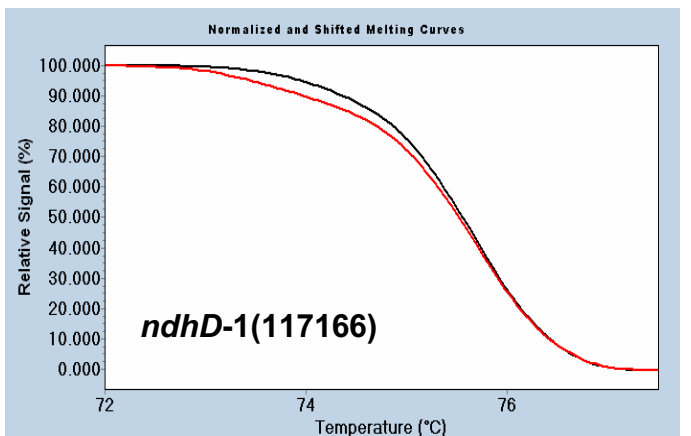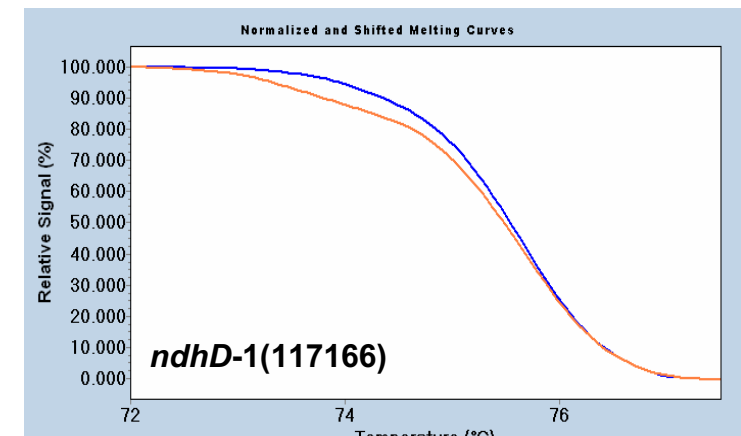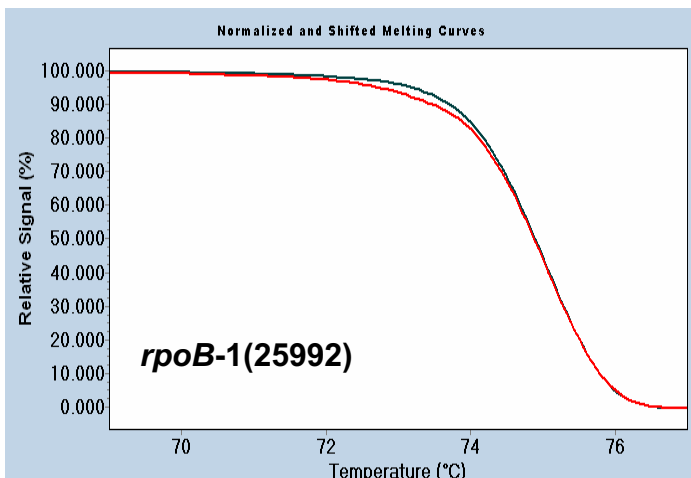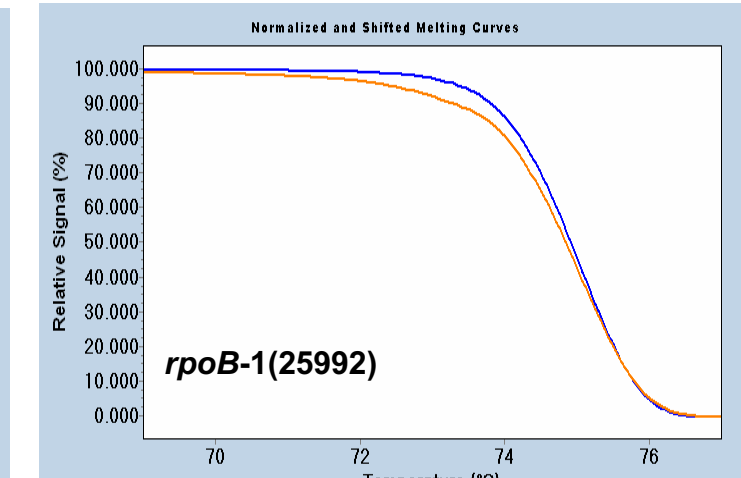

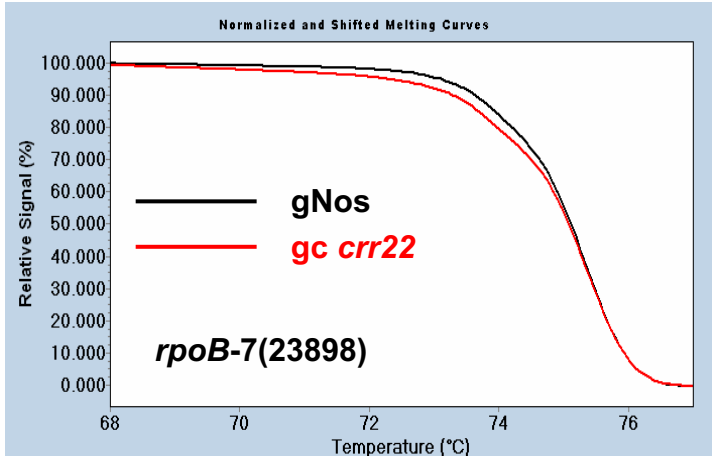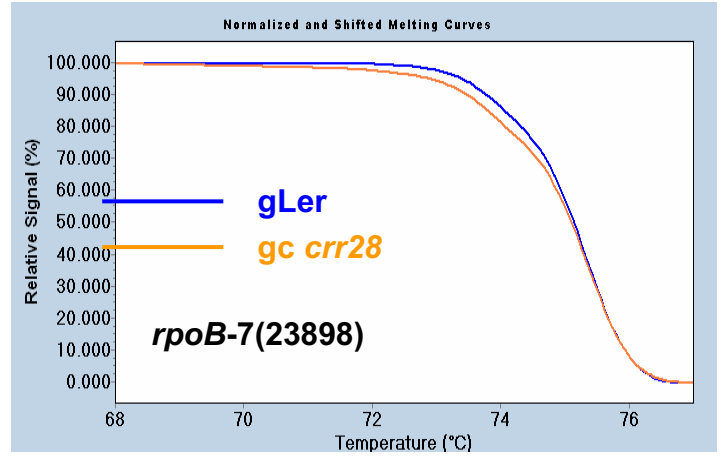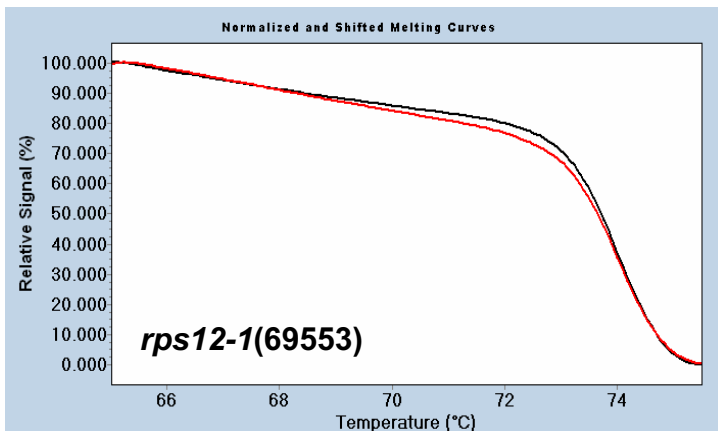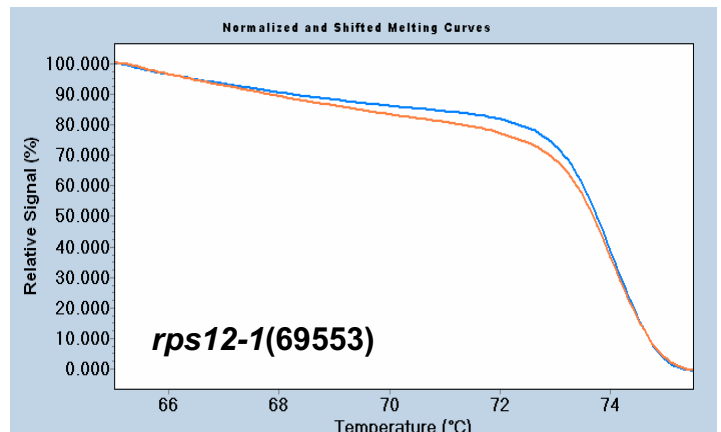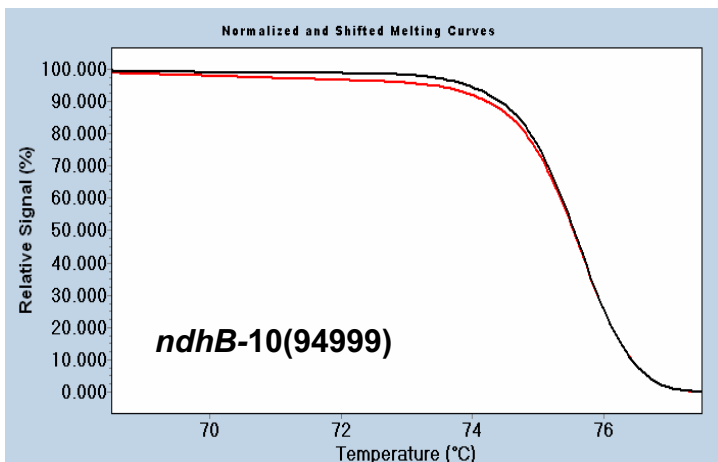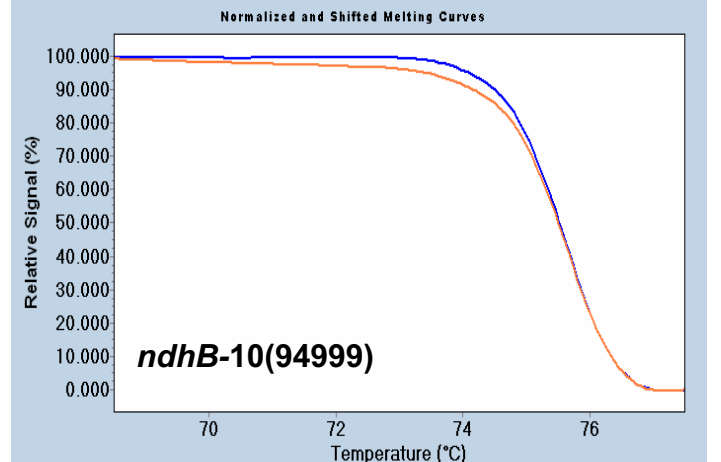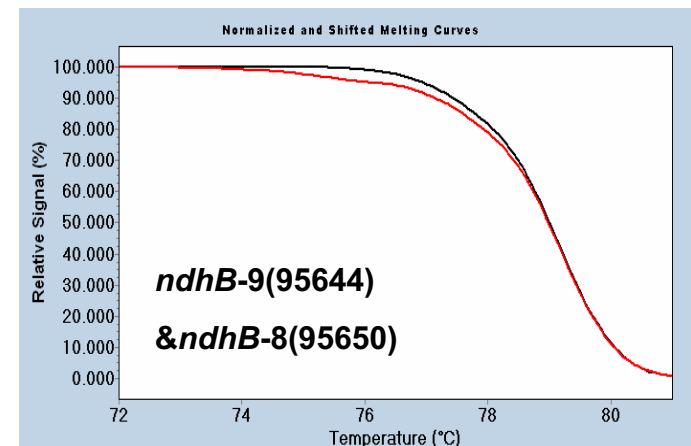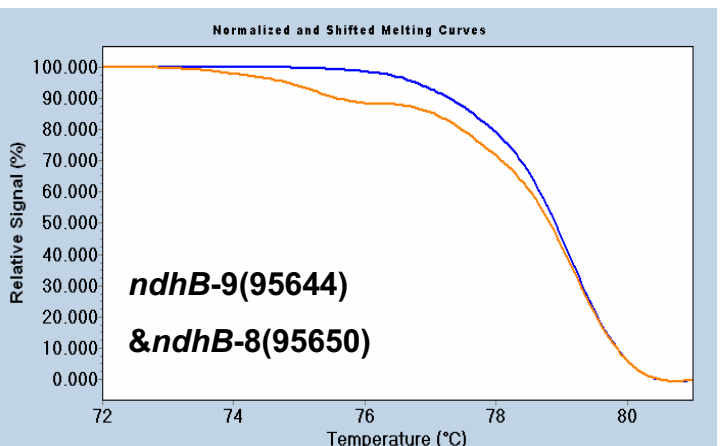



**Supplemental Figure 1. High resolution melting screen of *crr22* and *crr28* mutants.** Real-time PCR was done using primers surrounding the 34 known editing sites of *Arabidopsis* in the presence of a fluorescent double-strand-specific dye. At the end of the amplification, amplicons were denatured, renatured and then melted using precise incremental increases in temperature. Melting of DNA duplexes releases the dye, causing a decrease in fluorescence. The presence of less thermostable heteroduplexes in a sample alters the shape of the melting curves. For each editing site, the melting curve of a control consisting of genomic DNA (g) from the wt sample was compared to the melting curves of a mix of genomic DNA and cDNA (gc) from the mutant lines. Editing produces cDNA with a nucleotide change and thus the mix of genomic DNA and cDNA exhibits a different melting curve from that of genomic DNA alone. If an editing site is unedited in the mutant, then the melting curves from the genomic DNA sample and the mixed genomic/cDNA sample are identical.

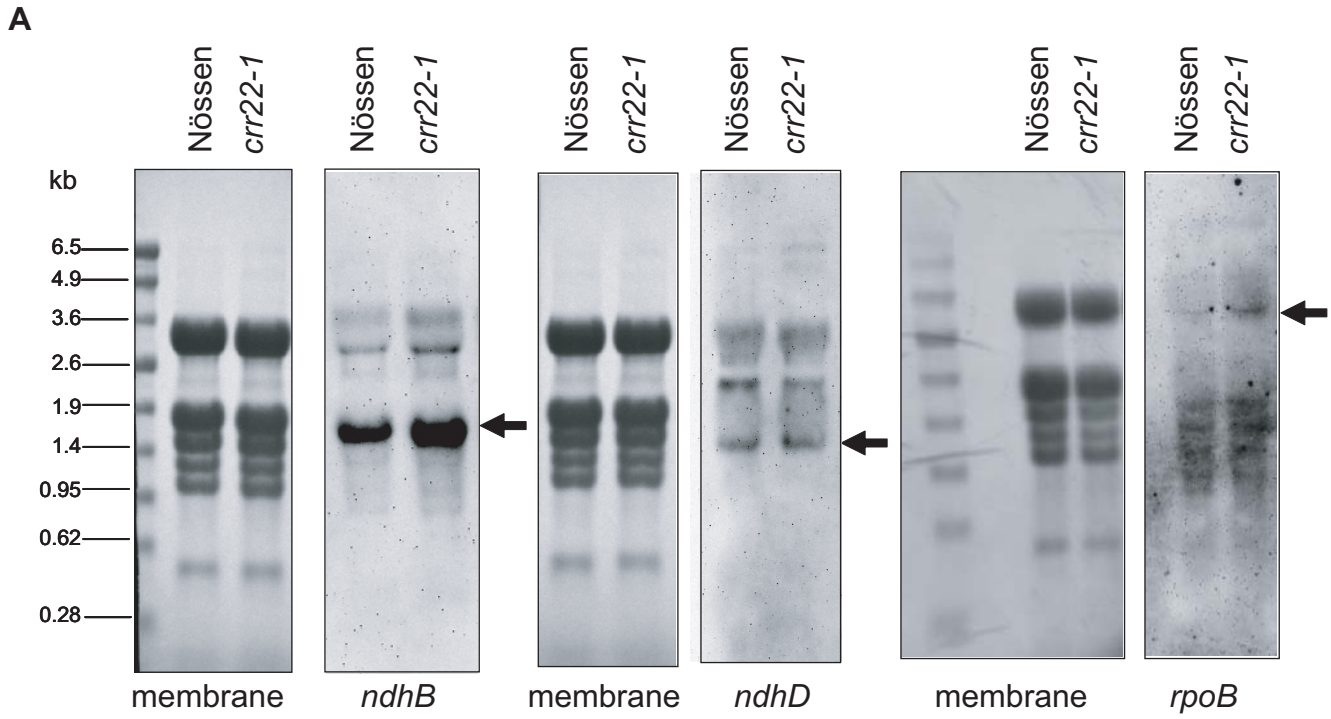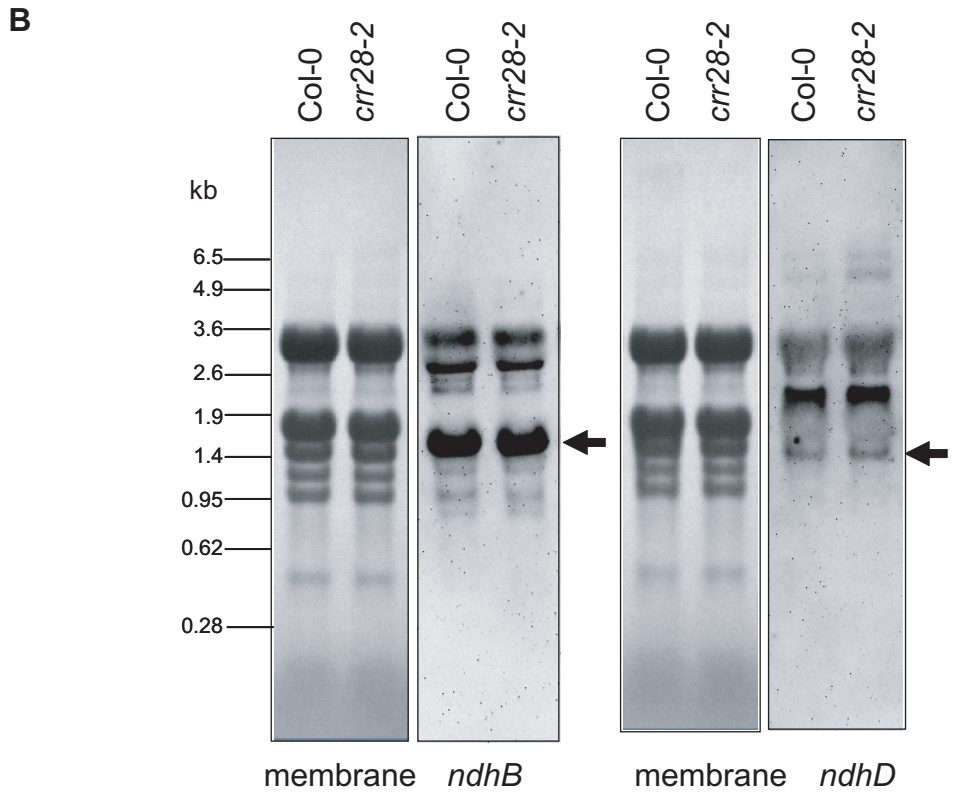

**Supplemental Figure 2. Transcript profiles of genes with editing defects in *crr22* (A) and *crr28* (B).** Ten µg of RNA from 15-day-old seedlings (15 µg for *rpoB*) was loaded on formaldehyde agarose gels and transferred onto a membrane. Hybridizations were performed under high-stringency conditions using antisense RNA probes for the genes specified for each blot. The arrows point at the mature transcript. The sizes of

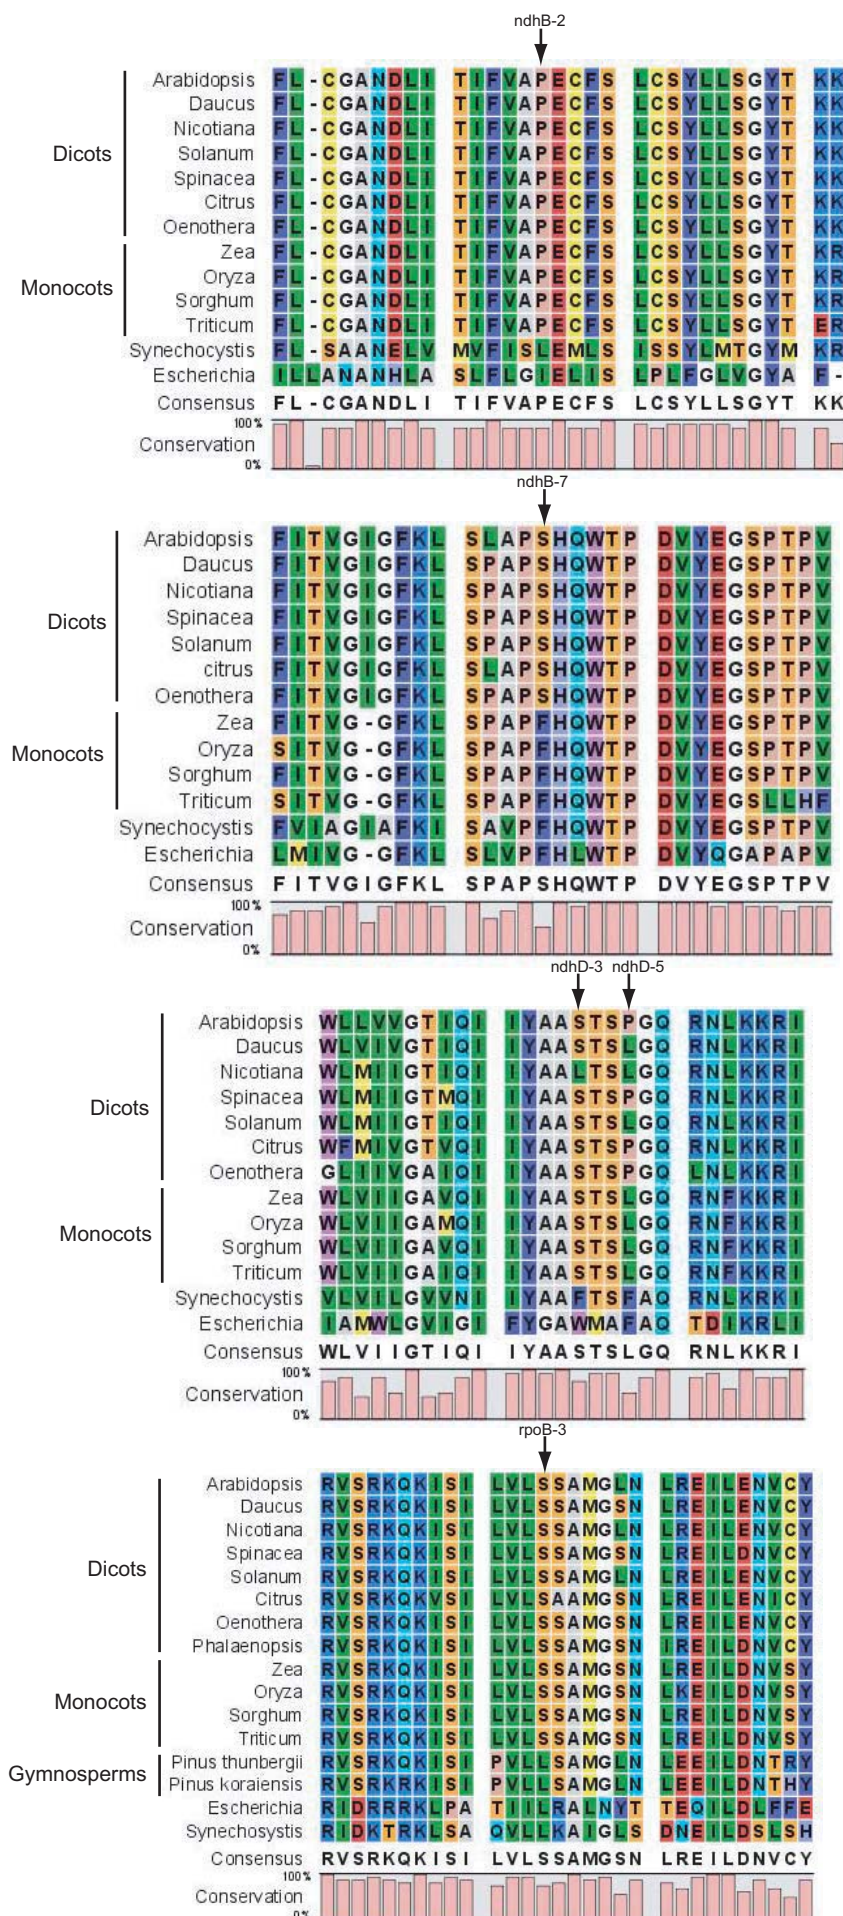

**Supplemental Figure 3. Partial sequence alignments of NdhB, NdhD, and RpoB around the amino acids affected by RNA editing.** *Arabidopsis* NdhB, NdhD, and RpoB proteins were aligned with their homologues from other species. The alignment

was performed by using CLC Free Workbench 3.1 software (<http://www.elcbio.com>)

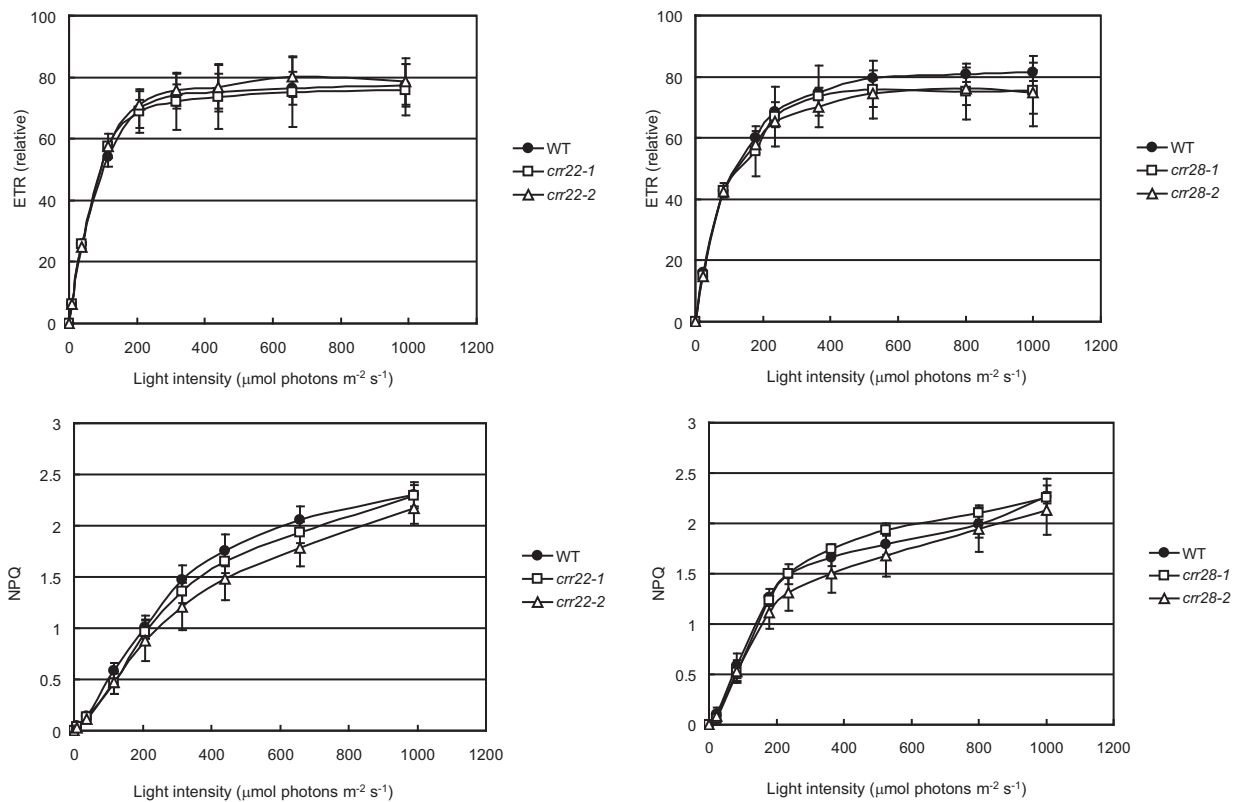

**Supplemental Figure 4. *In vivo* analysis of electron transport activity. (A)** Light intensity dependence of ETR (electron transport rate). ETR is plotted relative to  $\phi_{\text{PSII}} \times$  light intensity ( $\mu\text{mol photons m}^{-2} \text{s}^{-1}$ ), where  $\phi_{\text{PSII}}$  is quantum yield of photosystem II **(B)** Light intensity dependence of NPQ (non-photochemical quenching) of chlorophyll fluorescence. All values represent the mean  $\pm$ SD (n=3).

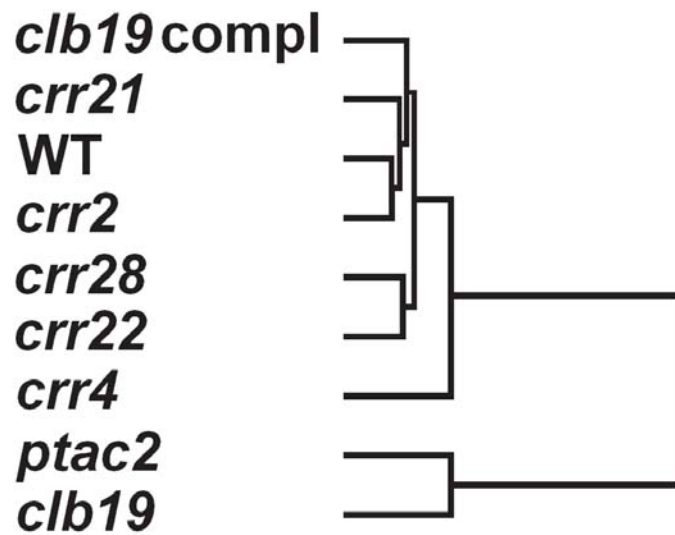

**Supplemental Figure 5. Hierarchical clustering of *crr22* and *crr28* mutants based on their plastid RNA profiles assessed by quantitative RT-PCR.** The tree was calculated using the euclidian distance based on  $\log_2$  (mutant/WT) ratios for all plastid transcripts. *clb19* (Chateigner-Boutin et al., 2008) and *ptac2* (Pfalz et al., 2006) are impaired in PEP activity and *otp51* (de Longevialle et al., 2008) shows a specific *ycf3* splicing defect.

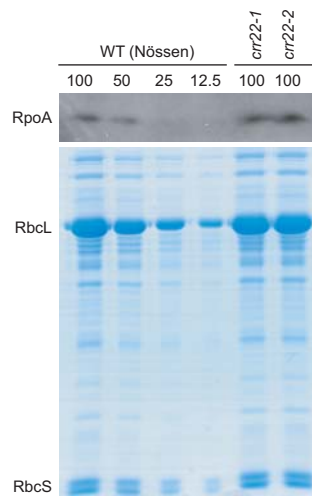

**Supplemental Figure 6. Protein blot analysis of the plastid-encoded RNA polymerase (PEP).** Immunodetection was performed using antibodies against the PEP subunit, RpoA. Proteins were extracted from the stroma fraction. The lanes were loaded with protein samples corresponding to 1.0  $\mu\text{g}$  chlorophyll for RpoA (100%) and the series of dilutions indicated. The Coomassie Brilliant Blue stained gel lanes are shown as loading controls.



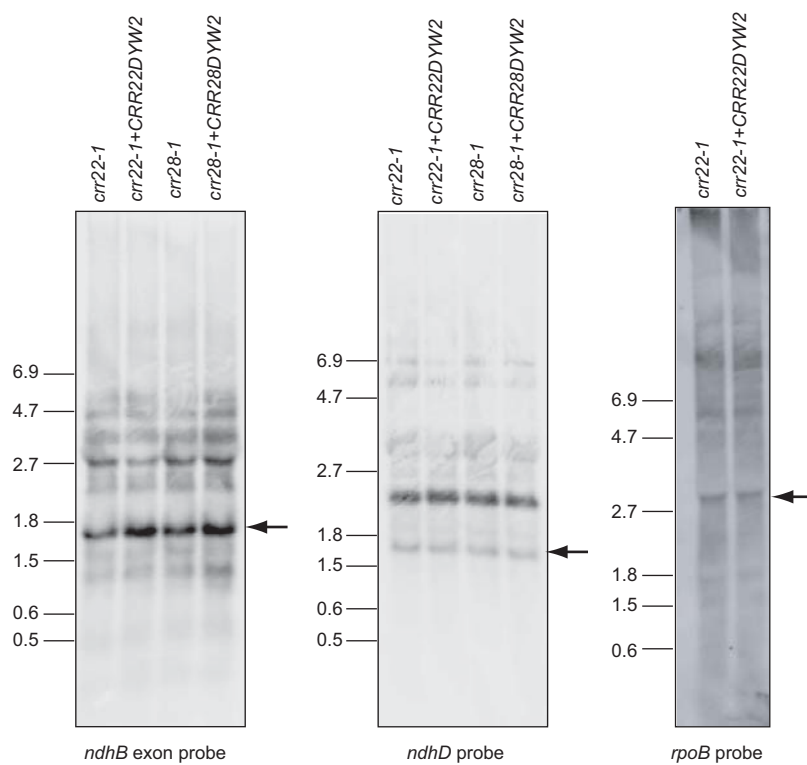

**Supplemental Figure 7. Patterns of *rps7-ndhB*, *psaC-ndhD*, and *rpoB* transcripts.** Total RNA (5  $\mu$ g) isolated from leaves of 4-week-old *crr22-1*, *crr22-1+CRR22DYW2*, *crr28-1*, and *crr28-1+CRR28DYW2* were analyzed by RNA gel blot hybridization. The arrows point at the mature transcript. The positions of RNA size markers are indicated at left. *crr22-1+CRR22DYW2*, *crr22-1* transformed with CRR22, in which the DYW motif was replaced by that of CRR2; *crr28-1+CRR28DYW2*, *crr28-1* transformed with CRR28, in which the DYW motif was replaced by that of CRR2.

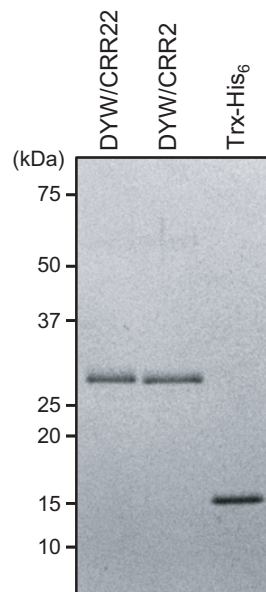

**Supplemental Figure 8. Purified recombinant proteins used in this study.** All proteins were expressed as native forms. The proteins were purified and analyzed by SDS-PAGE (10-20% gradient gel) and Coomassie Brilliant Blue. Three hundred nanograms of protein were loaded in each lane.



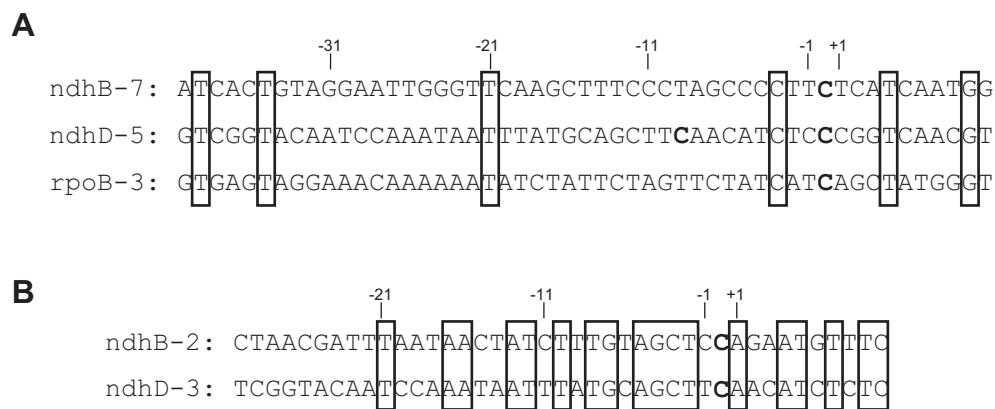

**Supplemental Figure 9. Comparison of the nucleotide sequences in the regions surrounding the editing sites affected in *crr22* and *crr28*.** (A) Sequence alignment of the region surrounding ndhB-7, ndhD-5, and rpoB-3 editing sites. The alignment includes the sequence from -40 to +10 around the edited C (bold letter) with identical nucleotides shown by boxes. (B) Sequence alignment of the region surrounding ndhB-2, and ndhD-3 editing sites. The alignment includes the sequence from -30 to +10 around the edited C (bold letter) with identical nucleotides shown by boxes.

**Supplemental Table 1.** Comparison of chloroplastic transcripts abundance

|        | <i>clb19</i> com | <i>crr21</i> | WT | <i>ptac2</i> | <i>clb19</i> | <i>crr2</i> | <i>crr28</i> | <i>crr22</i> | <i>crr4</i> |
|--------|------------------|--------------|----|--------------|--------------|-------------|--------------|--------------|-------------|
| psbA   | -0.38125         | -0.14705     | 0  | -3.8779      | -4.57567     | -0.67397    | -0.41997     | -0.71136     | -0.81133    |
| matK   | 0.671019         | 0.08202      | 0  | 0.124091     | 0.553087     | 0.25415     | 0.339983     | -0.2641      | 1.484087    |
| rpS12A | 0.074942         | -0.28521     | 0  | -0.94179     | -0.2215      | -0.4532     | -0.2632      | 0.198711     | 0.645355    |
| psbK   | 0.427897         | -0.24209     | 0  | -1.65544     | -1.58963     | 0.132385    | 0.056378     | 0.333913     | -0.12488    |
| psbI   | -0.32925         | -0.2343      | 0  | -1.66793     | -1.46278     | 0.272833    | 0.186379     | -0.03754     | -0.25542    |
| atpA   | -0.09327         | -0.14593     | 0  | 0            | -0.04168     | 0.071723    | 0.413949     | 0.102194     | -0.30753    |
| atpF   | 0.181563         | -0.2213      | 0  | -0.89919     | -0.8319      | 0.074549    | 0.283737     | 0.166897     | -0.13843    |
| atpH   | 0.509303         | 0.093735     | 0  | -0.53696     | -0.43326     | 0.188153    | 0.147679     | -0.01748     | -0.03118    |
| atpI   | 0.296769         | 0.21967      | 0  | -0.05971     | 0.112962     | -0.04439    | 0.176054     | 0            | -0.14002    |
| rpS2   | -0.00512         | 0.411275     | 0  | 1.7392       | 2.3521       | 0.080286    | 0.368717     | -0.02673     | 0.011362    |
| rpoC2  | 0.071436         | 0.762842     | 0  | 2.246464     | 2.943508     | 0.470615    | 0.5924       | 0.103809     | 0.757141    |
| rpoC1  | -0.30467         | 0.107867     | 0  | 2.386763     | 3.111502     | 0.075775    | 0.099081     | 0.401907     | -0.35292    |
| rpoB   | 0.037081         | 0.309326     | 0  | 1.561543     | 2.329089     | -0.0091     | 0.179285     | -0.00344     | 0.290118    |
| petN   | -0.14873         | -0.49599     | 0  | -1.40701     | -1.06757     | -0.24438    | -0.4855      | -0.47037     | -0.41972    |
| psbM   | 0.221208         | -0.72134     | 0  | -1.31095     | -1.82626     | -0.13643    | -0.24209     | -0.40592     | -0.63194    |
| psbD   | -0.08933         | -0.00493     | 0  | -1.40386     | -2.22861     | -0.27958    | 0.012537     | -0.17239     | -1.25433    |
| psbC   | -0.17308         | 0.171566     | 0  | -1.7116      | -4.60719     | 0.015179    | -0.12805     | 0.01859      | -0.67392    |
| psbZ   | -0.04097         | -0.30711     | 0  | -2.12995     | -3.0276      | 0.014008    | 0            | -0.1392      | -0.3782     |
| rps14  | -0.19901         | 0.15104      | 0  | 0.26234      | -0.44375     | 0.301574    | 0.037828     | -0.20308     | -0.04386    |
| psaB   | 0.1589           | 0.302381     | 0  | -1.73207     | -1.52257     | 0.223282    | 0.328701     | 0.415821     | -0.47759    |
| psaA   | 0.083826         | 0.563788     | 0  | -1.85385     | -1.81324     | 0.251565    | 0.365921     | 0.486458     | -0.56606    |
| ycf3   | -0.05335         | 0.008775     | 0  | -0.95562     | 0.377306     | -0.04325    | 1.052007     | -0.42267     | 1.208809    |
| rps4   | 0.152839         | 0.011478     | 0  | 1.101467     | 1.596025     | -0.00514    | 0.32226      | -0.22848     | 0.411232    |
| ndhJ   | -0.43084         | -0.74484     | 0  | 0.605819     | 0.092139     | -0.06037    | 0.083444     | 0.120421     | -0.3152     |
| ndhK   | -0.23067         | -0.56226     | 0  | 0.446139     | 0            | -0.00917    | 0.10537      | 0.210195     | -0.31027    |
| ndhC   | -0.30827         | -0.39026     | 0  | 0.346067     | 0.017382     | 0.168074    | 0.379449     | 0.128164     | -0.07792    |
| atpE   | -0.10356         | -0.37714     | 0  | 0.44481      | 0.76751      | -0.14723    | -0.15808     | -0.31277     | 0.166729    |
| atpB   | -0.00753         | -0.22791     | 0  | 0.419167     | 0.55861      | -0.03307    | -0.09224     | -0.17452     | 0.210903    |
| rbcL   | 0.265241         | -0.06364     | 0  | -3.09319     | -2.98438     | 0.038422    | 0.05315      | -0.18225     | 0.095623    |
| accD   | 0.419467         | 0.93634      | 0  | 1.773232     | 1.403921     | -0.0981     | 0.180863     | 0.367384     | 0.255014    |
| psaI   | 0.182635         | -0.22337     | 0  | -0.22        | -0.02555     | -0.00911    | 0.095467     | 0.033771     | -0.5321     |
| ycf4   | 0.324215         | 0.067878     | 0  | 0.160222     | 0.434774     | 0.075215    | 0.337705     | 0.285886     | -0.20653    |
| cemA   | 0.308141         | -0.04881     | 0  | 0.245092     | 0.190068     | -0.06729    | 0.544942     | 0.231123     | -0.16338    |
| petA   | 0.093455         | 0.087155     | 0  | 0.236524     | 0.129564     | -0.16575    | 0.274886     | 0.120332     | 0.18341     |
| psbJ   | -0.05824         | 0.180033     | 0  | -0.31487     | -0.43318     | 0           | -0.22618     | -0.51979     | 0.119915    |
| psbL   | 0.098901         | -0.27597     | 0  | -1.89654     | -2.20932     | -0.25733    | -0.66073     | -0.24499     | -0.26296    |
| psbF   | 0.108163         | -0.28141     | 0  | -2.02175     | -2.28457     | -0.30071    | -0.47084     | -0.13086     | -0.01192    |
| psbE   | 0.014451         | -0.05347     | 0  | -2.73972     | -2.81749     | -0.03415    | -0.52213     | -0.20322     | -0.08725    |
| petI   | -0.14677         | -0.19595     | 0  | -0.42739     | -0.59631     | -0.40411    | -0.44525     | -0.15135     | 0.239166    |
| petG   | -0.89175         | -0.2404      | 0  | -0.64021     | -0.61463     | -0.34444    | -0.36815     | -0.18852     | 0.219649    |
| psaJ   | 0.222831         | -0.10214     | 0  | -1.86917     | -1.96043     | 0.041747    | -0.16982     | -0.50234     | 0.41297     |
| rpL33  | 0.251907         | 0.000983     | 0  | 2.126871     | 1.799208     | -0.37604    | 0.2385       | -0.2442      | -1.5403     |
| rpS18  | -0.00039         | 0.007525     | 0  | 2.620379     | 2.664124     | -0.23754    | -0.05371     | 0.000145     | -0.76698    |
| rpL20  | -0.27397         | -0.04246     | 0  | 2.303254     | 2.710002     | -0.07961    | -0.03773     | 0.165935     | -0.22051    |
| clpP1  | 0                | 0.195672     | 0  | 0.47484      | 1.427224     | -0.42206    | -0.10212     | 0.463934     | 0.061215    |
| psbB   | 0.263667         | 0.063854     | 0  | -1.79702     | -1.60573     | 0.010932    | -0.19152     | -0.13256     | -0.26908    |
| psbT   | 0.165803         | 0.143095     | 0  | -1.52063     | -1.6223      | 0.294348    | 0.159697     | 0.016366     | -0.266      |
| psbN   | -0.4514          | 0.156777     | 0  | -3.21194     | -3.34212     | -0.16796    | -0.08396     | -0.45128     | -0.53972    |
| psbH   | 0.396272         | 0.03559      | 0  | -2.68629     | -2.70398     | 0.057436    | 0.169413     | 0.107329     | -0.12235    |
| petB   | 0.287102         | -0.01252     | 0  | -1.30776     | -1.41211     | -0.31248    | -0.15551     | -0.22931     | -0.36083    |
| petD   | 0.081309         | -0.04154     | 0  | -1.99376     | -1.80762     | -0.15841    | -0.11159     | -0.39164     | -0.23071    |
| rpoA   | 0.335677         | 0.399541     | 0  | 1.531229     | 2.027805     | 0.246353    | -0.07601     | 0.293778     | 0.180423    |
| rpS11  | 0.22911          | 0.279179     | 0  | 1.588512     | 2.131779     | 0.216992    | 0.006112     | 0.206499     | 0.248139    |
| rpL36  | 0.121849         | 0.195948     | 0  | 1.704809     | 2.041811     | 0.374138    | -0.03358     | 0.133785     | 0.267518    |
| rpS8   | 0.142118         | 0.34107      | 0  | 1.50758      | 1.981663     | 0.413704    | -0.12018     | 0.174237     | 0.415669    |
| rpL14  | 0.439935         | 0.183462     | 0  | 1.461706     | 1.769387     | 0.43001     | -0.05975     | 0.061445     | 0.516808    |
| rpL16  | 0.056062         | 0.291559     | 0  | 1.320629     | 1.762046     | 0.33362     | -0.16031     | 0.062178     | 0.73677     |

|        |          |          |   |          |          |          |          |          |          |
|--------|----------|----------|---|----------|----------|----------|----------|----------|----------|
| rpS3   | 0.291576 | 0.389402 | 0 | 1.278306 | 1.795297 | 0.486295 | 0.026474 | 0.023691 | 0.807895 |
| rpL22  | 0.491369 | 0.184881 | 0 | 1.5842   | 1.630596 | 0.286208 | 0.339009 | 0.023903 | 1.16045  |
| rpS19  | -0.08635 | 0.154861 | 0 | 0.99929  | 1.556277 | 0.1142   | 0.004283 | -0.12605 | 1.062649 |
| rpL2   | 0.314834 | -0.33038 | 0 | 0.529462 | 0.804339 | 0.08583  | -0.23603 | 0.009119 | 0.334961 |
| rpL23  | 0.269965 | 0.021103 | 0 | 0.578327 | 0.708685 | 0.292943 | -0.03088 | 0.128508 | 0.392572 |
| ycf2.1 | -0.16834 | 0.12604  | 0 | 1.699755 | 1.587179 | 0.127957 | 0.244022 | 0.229436 | 0.881938 |
| ycf15  | -0.29407 | 0.11647  | 0 | 1.49369  | 1.69659  | 0.310014 | 0.07626  | -0.02416 | 1.248631 |
| ndhB   | 0.003708 | -0.39523 | 0 | 1.098768 | 0.437822 | -0.65445 | -0.09221 | 0.087187 | 0.465247 |
| rpS7   | -0.02688 | 0.061374 | 0 | 1.211729 | 1.279704 | -0.37696 | -0.09157 | 0.32785  | 0.237227 |
| ycf1   | 0.163605 | -0.26711 | 0 | 1.341033 | 0.764235 | 0.327667 | 0.360155 | 0.361365 | 0.522341 |
| ndhF   | -0.13706 | 0.189725 | 0 | 0.264457 | -0.20554 | 0.341312 | 0.468212 | 0.676297 | 0.190206 |
| rpL32  | 0.342982 | -0.50708 | 0 | 1.212828 | 1.541495 | -0.20337 | -0.46186 | 0.069544 | 0.128561 |
| ccsA   | 0.033335 | 0        | 0 | 1.654077 | 1.518438 | 0.294156 | -0.28024 | -0.23497 | 0.238918 |
| ndhD   | 0.215151 | 0.206616 | 0 | 0.883917 | 1.037706 | 0.653851 | 0.534861 | -0.18681 | 0.353621 |
| psaC   | -0.03317 | -0.45609 | 0 | -0.25472 | -0.76016 | 0.368134 | -0.02835 | -0.0211  | 0        |
| ndhE   | -0.12823 | -0.32127 | 0 | -0.75745 | -1.13218 | -0.06022 | 0.377882 | 0.03196  | 0.02767  |
| ndhG   | -0.23877 | -0.02818 | 0 | -0.15552 | -0.67299 | 0.101225 | 0.472589 | 0.233858 | 0.065162 |
| ndhI   | -0.02907 | 0.084631 | 0 | 0.101314 | -0.31914 | -0.10346 | 0.602739 | 0.22511  | -0.13776 |
| ndhA   | -0.21574 | 0.138724 | 0 | -2.74413 | -4.92625 | 0.206829 | 0.393505 | 0.124265 | -0.00708 |
| ndhH   | -0.24999 | 0.22468  | 0 | 2.165984 | 1.755051 | -0.02338 | 0.551369 | 0.15399  | -0.10225 |
| rpS15  | -0.19019 | 0.11887  | 0 | 2.270055 | 2.571506 | -0.00273 | -0.06427 | -0.19332 | 0.81204  |
| 18S    | -0.22976 | -0.59274 | 0 | -0.25311 | -0.01346 | -0.44106 | -0.33605 | -0.84764 | -0.37712 |
| QC16S  | -0.47486 | -0.25898 | 0 | -2.6706  | -3.10477 | -0.22244 | -0.3217  | -0.4965  | -0.30674 |
| QC23S  | -0.43732 | -0.28219 | 0 | -2.1595  | -1.22693 | 0.011775 | -0.46911 | -0.11401 | 1.385455 |

**Supplemental Table 2. Oligonucleotide primers used**

| name                                       | sequence                       |
|--------------------------------------------|--------------------------------|
| For generating PCR templates for PPE assay |                                |
| ndhDATfor:                                 | CAAGCCTAATTCTATCATAACTCG       |
| ndhDATrev:                                 | AAGTTTATATGGTTCGAACG           |
| ndhBedIII:                                 | ATTTCTTGAAGCTCAATCTCTCCCCCGGAT |
| ndhBfor2:                                  | TCATGATCTGGCATGTACAG           |
| Nb11:                                      | TTCATGCTTGTTTGAGTAATAGC        |
| p12.AT:                                    | GATCTAATGAGGCTACTATG           |
| rpoBATfor:                                 | GAAAACCAGTAGGAATATGC           |
| rpoBATrev:                                 | GTCTCCAATTAATATTTTCGGCG        |
| For PPE assay                              |                                |
| ndhD(116290)_PPE_C:                        | AGTCGGTACAATCCAAATAATTTATGCAGC |
| ndhD(116281)_PPE_A:                        | GCTATTCTCTTTTTTAAATTACGTTGA    |
| ndhB(96998)_PPE_C:                         | CTAACGATTTAATAACTATCTTTGTAGCTC |
| ndhB(96419)_PPE_C:                         | AGGAATTGGGTTCAAGCTTCCCTAGCCCC  |
| rpoB(25779)_PPE_C:                         | GTAGGAAACAAAAAATATCTATTCTAGTTC |
| For HRM analysis                           |                                |
| matK_HRM_for:                              | TGAATCCAAGATTTTTCTTGTTCTT      |
| matK_HRM_rev:                              | AAAAAGATGGATTCGTATTCACA        |
| atpF_HRM_for:                              | GCCGGGAGTTTCGGATTTA            |
| atpF_HRM_rev:                              | GATCAATACACCGAAAAC TACTACTT    |
| rpoC1_HRM_F:                               | TTCTTTTGCTAGGCCATAA            |
| rpoC1_HRM_R:                               | TGCTGTATTTCCAGGATTGAA          |
| rpoB23898_HRM_for:                         | TGGTTCAAGTTATAACCCAGAAAT       |
| rpoB23898_HRM_rev:                         | CCATGTCTTCCAGCTACTTTATCA       |
| rpoB25779_HRM_for:                         | GCTCGGGTGAGTAGGAAACA           |
| rpoB25779_HRM_rev:                         | TCTAGAATTTCTCGTAGATTCAAACC     |
| rpoB25992_HRM_for:                         | TCCTTTAATGAATTCCTTGGA          |
| rpoB25992_HRM_rev:                         | CGGGACTTTGCAATATTTGAT          |
| psbZ_HRM_for:                              | TGCTTTCCAATTGGCAGTTT           |
| psbZ_HRM_rev:                              | GAGACGCAAATACAACGGGTA          |
| RPS14(37092)HRM_for:                       | TCGCTAAGTGAGAAATGGAAAA         |

RPS14(37092)HRM\_rev: CGTCGATGAAGACGTGTAGG  
RPS14(37161)HRM\_for: GAAGAAGAGGCCAAAAATTGGAA  
RPS14(37161)HRM\_rev: TTCTCACTTAGCGACGGAATC  
accD\_HRMfor: TGAATGTTTGTGAACAATGTGG  
accD\_HRMrev: GATTCCAAGTACCCGGATCA  
accD(58642)HRM\_rev: ACTTTTTAGCTTGTTGATAGAGGTTT  
accD(58642)HRM\_for: GCATTTTTCTTTCAAATCATTTTT  
psbF\_HRM\_rev: TCGTTGGATGAACTGCATTG  
psbF\_HRM\_for: GGCTGTTCATGGACTAGCTGTA  
psbE\_HRM\_rev: TGGGTCCTCCTAAAAAGATCTAC  
psbE\_HRM\_for: AAGGCATTCCATTAATAACAGG  
petL\_HRM\_for: ATTTTATTGAGTCCCTTCATGC  
petL\_HRM\_rev: AAAGCTGCTAGTAGAAAACCGAAA  
Rps12\_HRM\_rev: TCGAGTTCGTCCATTCTATTTT  
Rps12\_HRM\_for: AGACTGAGACATAAAAAGGAAATTCT  
clpPA2rev: TGAACCGCTACAAGATCAAC  
clpP\_HRM70for: GAAGACATGGAACGGGATGT  
rpoA\_HRMfor: TTGGCGAAATAGAAGGAACA  
rpoA\_HRMrev: CCTGCTATGTTAGAATAGTCATGTGG  
Rpl23\_HRM\_r: GAAGAGTTCGACCCAATGCT  
Rpl23\_HRM\_f: TCAATATACTTTTAATGTCGAATCAGG  
ndhB(94999)HRM\_for: TTCCATCGAATTGAGTATGATTG  
ndhB(94999)HRM\_rev: AATCGCAATAATCGGGTTCA  
ndhB95225\_HRM\_for: GGTCTTCCCTCCACTAGCAGGT  
ndhB95225\_HRM\_rev: CTGCCATCCACACCAGAATA  
95640R: CACTCGAATTTTCGATATTCCTTT  
ndhB(95608)HRM\_rev: TCCAGAAGAAGATGCCATTCA  
95618F: AAGGAATATCGAAAATTTCGAGTGG  
95693R: CCAGTCGTTGCTTTTCTTTCTG  
95627F: CGAAAATTCGAGTGGCTGA  
95698R: CCACTCCAGTCGTTGCTTTT  
96461R: TCATCACTGTAGGAATTGGGTTT  
ndhB(96419)HRM\_rev: CTTCGTATACGTCAGGAGTCCA  
96606R: GGTGGGGCAAGCTCTTCTAT  
96537F: CAATCTCTCCCCCGGATG  
ndhB(96698)HRM\_for: TTTTTATGTGGTGCTAACGATTT

ndhB(96698)HRM\_rev: CCAGATAATAGGTAGGAGCATAAACTG  
 ndhB(97016)HRM\_for: TTGGCCTAATTCTTCTTCTGATG  
 ndhB(97016)HRM\_rev: TTGAAGAGATGAAATATAACCAAGG  
 ndhF(112349)HRM\_for: TTCGGTTACTTTATCGATCCAC  
 ndhF(112349)HRM\_rev: TCAGAACC AAAATCCCAACAG  
 116318R: GGTACAATCCAAATAATTTATGCAG  
 116228F : CCATATGAGATACAGAAGAATAGGC  
 ndhD(116494)HRM\_for: TTGGATTTCTTATTGCTTTTGC  
 ndhD(116494)HRM\_rev: CACCGTGGGTGTCAGGTAAC  
 ndhD(116785)HRM\_for: AGCAATGTACAGCGGTCAAA  
 ndhD(116785)HRM\_rev: TTCTAATTCCCACATGATGAAAAA  
 ndhD(117166)HRM\_for: TTGGACCTGGTGTATCTTGTC  
 ndhD(117166)HRM\_rev: CCAGCAGATATTGGAAAAACAA  
 ndhG\_HRMfor: TTGCCTGGACCAATACATGA  
 ndhG\_HRMrev: CACTCCCAGACCCCTACTA

For analysis of RNA editing in transgenic plants

ndhB-FW: TGCTTCTCTTCGATGGAAG  
 ndhB-RV: TCCTTCGTATACGTCAGG  
 ndhB-FW2: TCCCACTCCAGTCGTTG  
 ndhB-RV2: TGAGCAATCGCAATAATCG  
 ndhD-FW: AGTACGCGTTCTTTGGAC  
 ndhD-RV: TAGCTCCATTAAGTCCAGG  
 rpoB-FW: TCAATTGGTAGAACCTCTG  
 rpoB-RV: TATTTGGCGACCAATCC

For RNA gel blot analysis

ndhB-exon-FW: TCTCCCACTCCAGTCGTTG  
 ndhB-exon-RV: TGAGCAATCGCAATAATCGG  
 ndhD-FW: TTCTTCTAACGACCTACGC  
 ndhD-RV: TAATCGGTGATTTGACGGC  
 rpoB-FW: AGGGAACATCTGCAATACC  
 rpoB-RV: CTCCTTATCGGTCAAGAAAG

For construction of pT-DYW2 and pT-DYW22

CRR2\_H4-F: GGGAGATCTCTTGGTTCTTGTAGAATTCACGG

CRR2\_F-R: GGGGTCGACCCAGTAATCTCCACAAGAACAC  
DYW22-OX-FW: GAAGCTGGTTATGTCCTG  
DYW22-OX-RV: CCAGTAATCTCCGCACG

Preparation of template DNA for *in vitro* transcription

NB2-F: ATGTAATACGACTCACTATAGGGGTTATATTTTCATCTCTTCAA  
CAAG

NB2-R: CCCATAGGGGCATAAACTGAAACATTCTGGAGC

---

## Supplemental Methods

### Chlorophyll Fluorescence Analysis

Chlorophyll fluorescence was measured with a MINI-PAM portable chlorophyll fluorometer (Walz, Effeltrich, Germany) in ambient air at room temperature (25°C). Minimum fluorescence at open PSII centers in the dark-adapted state ( $F_o$ ) was excited by a weak measuring light (wavelength 650 nm) at a PFD of 0.05-0.1  $\mu\text{mol m}^{-2} \text{s}^{-1}$ . A saturating pulse of white light (800 ms, 3,000  $\mu\text{mol photons m}^{-2} \text{s}^{-1}$ ) was applied to determine the maximum fluorescence at closed PSII centers in the dark-adapted state ( $F_m$ ) and during AL illumination ( $F_m'$ ). The steady state fluorescence level ( $F_s$ ) was recorded during AL illumination (15-1,000  $\mu\text{mol photons m}^{-2} \text{s}^{-1}$ ). These photosynthetic parameters were determined 2 min after the change of AL intensity. NPQ was calculated as  $(F_m - F_m')/F_m'$ . The quantum yield of PSII ( $\phi_{\text{PSII}}$ ) was calculated as  $(F_m' - F_s)/F_m'$  (Genty et al., 1989). ETR was calculated as  $\phi_{\text{PSII}} \times \text{PFD}$ . The transient increase in chlorophyll fluorescence after AL had been turned off was monitored as described (Shikanai et al., 1998).

### RNA preparation and RNA gel blot analysis

For Supplemental Figure 2, RNA preparation and RNA gel blot were performed as follows. Total RNA was isolated using a plant RNeasy kit (Qiagen, Valencia, CA). Ten micrograms of RNA (15 micrograms for *rpoB*) was loaded on formaldehyde agarose gels and transferred onto Hybond N+ nylon membrane (GE Healthcare, Piscataway, NJ). RNA integrity, loading and transfer were checked by staining the membrane with methylene blue. Hybridizations were performed under high-stringency conditions using antisense RNA probes internally labeled with biotinylated cytidine. The probes were synthesised by cloning PCR products in pGEM-T Easy vector (Promega, Madison, WI). The primers used for the PCR were *rpoB*.AT.for (GAAAACCAGTAGGAATATGC) and *rpoB*.AT.rev (GTCTCCAATTAATATTTTCGGCG), *ndhB*.AT.rev2 (CTAAAAAAGGGTATCCTGAGC) and *AndhB* (GTCGTTGCTTTTCTTTCTG) corresponding to the 2nd exon of *ndhB*, and *chloro 213 F* (AATAGTATTTCAAGTGTAACAGGATAGGA) and *chloro 213 R* (TGGACGATCCATTAATTCAACT) for *ndhD*. Clones with inserts in antisense orientation were amplified by PCR using the forward primer and M13/pUC reverse (GAGCGGATAACAATTTACACAGG). The PCR products served as a template for *in vitro* transcription with SP6 polymerase following the manufacturer's recommendations (Maxiscript Ambion). Signal detection was performed using the



Phototope Star detection kit (New England Biolabs, Ipswich, MA) and read in a LAS-1000 (FujiFilm). The arrows point at the mature transcript. Sizes of RNA markers (Promega) are shown in kilobases.

For Supplemental Figure 7, the fragments used as probes were obtained by PCR amplification using the oligonucleotides 5'-TCTCCCACTCCAGTCGTTG-3' and 5'-TGAGCAATCGCAATAATCGG-3' for *ndhB* and the oligonucleotides 5'-TTCTTCTAACGACCTACGC-3' and 5'-TAATCGGTGATTTGACGGC-3' for *ndhD*. Labeling of the probe was carried out by using a PCR DIG Probe Synthesis Kit (Roche, Indianapolis, IN). Total RNA was isolated from the leaves of 4-week-old plants by using an RNeasy Plant Mini Kit (Qiagen) and treated with DNase I (Invitrogen, Carlsbad, CA). Total RNA (5 µg) was then loaded onto a 1% agarose gel containing 0.6 M formaldehyde and electrophoresed in 1xMops buffer (pH 7.0) comprising 20 mM Mops, 5 mM sodium acetate, and 2 mM EDTA. After electrophoresis, the RNA was transferred onto a nylon membrane and hybridized with DIG-labeled DNA probe. The signals from the hybridized bands were detected by using a Gene Image CDP-Star Detection Kit (GE Healthcare).

### **Analysis of chloroplast transcripts and clustering**

Chloroplast transcript accumulation was analysed as described (Chateigner-Boutin et al., 2008). The profiles corresponding to the various samples analysed (see Supplemental Table 2) were clustered with Avadis Prophetic 4.3 (Strand Life Sciences) using the log<sub>2</sub> value of the mutant/WT ratios after normalization by setting the median of the ratios to 0 for each sample. The euclidian distances between the samples were then calculated and the dendrogram was drawn by hierarchical clustering using the complete linkage rule (D'haeseleer, 2005).

### **Constructs and Plant Transformation**

For complementation of the *crr22* and *crr28* mutations, the wild-type genomic sequence delimited by 5'-CCTCCAATTCTTGCGTTTG-3' and 5'-TCACCAGTAATCTCCGCAC-3' including the *CRR22* coding region and by 5'-GAGAAGGACTTGATGAGG-3' and 5'-CTACCAGTAGTCTAAACAAG-3' including the *CRR28* coding region were cloned into pGWB-NB1 binary vector. The resultant plasmids were introduced into *crr22-1* and *crr28-1* via *Agrobacterium tumefaciens* ASE.

For the expression of CRR2, CRR22, and CRR28 lacking their DYW motifs to be deleted, the wild-type genomic sequences surrounded by 5'-

TCTCCATGAAAGCCATCC -3' and 5'-CAATCGGCTTCTATACTTC-3' for CRR2, 5'- CCTCCAATTCTTGCGTTTG -3' and 5'-TTTGATGTGGCATATCAGCTTC-3' for CRR22, and by 5'- GGAGAAGGACTTGATGAGG -3' and 5'-TCTTAGCCTGTCGTCGATC-3' for CRR28 were cloned into the pGWEB-NB1 binary vector fusing the HA-tag at the C-terminus. The resultant plasmids were introduced into *crr2-1*, *crr22-1*, and *crr28-1* via *Agrobacterium tumefaciens* ASE.

For the expression of CRR22 and CRR28 lacking their E and DYW motifs, the wild-type genomic sequences delimited by 5'- CCTCCAATTCTTGCGTTTG -3' and 5'-CAATCTCTCTGCTGCTTTC-3' for *CRR22* and by 5'-GAGAAGGACTTGATGAGG -3' and 5'-AATATTTCTAGCAATTTCTTCAC-3' for *CRR28* were cloned into the pGWEB-NB1 binary vector fusing the HA-tag at the C-terminus. The resultant plasmids were introduced into *crr22-1* and *crr28-1* via *Agrobacterium tumefaciens* ASE.

For the expression of CRR2, in which the DYW motif of CRR2 is replaced by that of CRR22 or CRR28, the wild-type genomic sequence delimited by 5'-TCTCCATGAAAGCCATCC-3' and 5'-CTTCATATCTTCGGCTAAC-3' was amplified by PCR and was ligated to the sequence encoding the DYW motif of CRR22 delimited by 5'-GAAGCTGGTTATGTTTCTG-3' and 5'- CCAGTAATCTCCGCACG -3' or the sequence encoding the DYW motif of CRR28 delimited by 5'-TCAATTGGTTATTTACCGGATG-3' and 5'- CCAGTAGTCTAAACAAGAGC-3'. The resultant chimeric genes were cloned into the pBIN19 binary vector fusing the HA-tag at the C-terminus. The resultant plasmids were introduced into *crr2-1* via *Agrobacterium tumefaciens* MP90.

For the expression of CRR22, in which the DYW motif of CRR22 is replaced by that of CRR2 or CRR28, the wild-type genomic sequence delimited by 5'- CCTCCAATTCTTGCGTTTG -3' and 5'- TTTGATGTGGCATATCAGCTTC -3' was amplified by PCR and was ligated to the sequence encoding the DYW motif of CRR2 delimited by 5'-GAGAAAGGGTACATACCAC-3' and 5'-CCAGTAATCTCCACAAGAAC-3' or the sequence encoding the DYW motif of CRR28 delimited by 5'- TCAATTGGTTATTTACCGGATG -3' and 5'- CCAGTAGTCTAAACAAGAGC -3'. The resultant chimeric genes were cloned into the pGWB-NB1 binary vector fusing the HA-tag at the C-terminus. The resultant plasmids were introduced into *crr22-1* via *Agrobacterium tumefaciens* ASE.

For the expression of CRR28, in which the DYW motif of CRR28 is replaced by that of CRR2 or CRR22, the wild-type genomic sequence surrounded by 5'-GGAGAAGGACTTGATGAGG -3' and 5'- TCTTAGCCTGTCGTCGATC -3' was

amplified by PCR and was ligated to the sequence encoding the DYW motif of CRR2 delimited by 5'- GAGAAAGGGTACATACCAC -3' and 5'- CCAGTAATCTCCACAAGAAC -3' or the sequence encoding the DYW motif of CRR22 surrounded by 5'- GAAGCTGGTTATGTTTCCTG-3' and 5'- CCAGTAATCTCCGCACG -3'. The resultant chimeric genes were finally cloned into the pGWB-NB1 binary vector fusing the HA-tag at the C-terminus. The resultant plasmids were introduced into *crr28-1* via *Agrobacterium tumefaciens* ASE.

### Supplemental References

- Chateigner-Boutin, A.L., Ramos-Vega, M., Guevara-Garcia, A., Andrés, C., de la Luz Gutiérrez-Nava, M., Cantero, A., Delannoy, E., Jiménez, L.F., Lurin, C., Small, I., and León, P.** (2008). CLB19, a pentatricopeptide repeat protein required for editing of *rpoA* and *clpP* chloroplast transcripts. *Plant J.* **56**: 590-602.
- Pfalz, J., Liere, K., Kandlbinder, A., Dietz, K.J., and Oelmüller, R.** (2006). pTAC2, -6, and -12 are components of the transcriptionally active plastid chromosome that are required for plastid gene expression. *Plant Cell* **18**: 176-197.
- de Longevialle, A.F., Hendricson, L., Taylor, N.L., Delannoy, E., Lurin, C., Badger, M., Millar, A.H., and Small, I.** (2008). The pentatricopeptide repeat gene *OTP51* with two LAGLIDADG motifs is required for the *cis*-splicing of plastid *ycf3* intron 2 in *Arabidopsis thaliana*. *Plant J.* **56**: 157-168.
- Genty, B., Briantais, J.M., and Baker, N.R.** (1989). The relationship between the quantum yield of photosynthetic electron-transport and quenching of chlorophyll fluorescence. *Biochim. Biophys. Acta* **990**: 87-92.
- Shikanai, T., Endo, T., Hashimoto, T., Yamada, Y., Asada, K., and Yokota, A.** (1998). Directed disruption of the tobacco *ndhB* gene impairs cyclic electron flow around photosystem I. *Proc. Natl. Acad. Sci. USA* **95**: 9705-9709.
- D'haeseleer, P.** (2005). How does gene expression clustering work? *Nat. Biotechnol.* **23**: 1499-1501.
